# Supplementary material for: Heteroaromatic ring-modified naphthalimide interlayer materials for efficient polymer solar cells
Source: Royal Society of Chemistry journal article supplement (doi:10.1039/d4ta08002e), 2025-01-01
Supplement: d4ta08002e1.pdf [file d4ta08002e1.pdf]

Electronic Supplementary Information for:

**Heteroaromatic ring modified naphthalimide interlayer materials for efficient polymer solar cells<sup>†</sup>**

Shuixing Dai,<sup>a,#,\*</sup> Jilei Jiang,<sup>a,#</sup> Liangmin Yu,<sup>b</sup> Lunxiu Cui,<sup>a</sup> Xu Zhang,<sup>c</sup> Canhui Zhang,<sup>a</sup>  
Ke Gao,<sup>c</sup> Heqing Jiang<sup>d</sup> and Minghua Huang<sup>a,\*</sup>

<sup>a</sup> School of Materials Science and Engineering, Ocean University of China, Qingdao 266100, China. E-mail: daishuixing@ouc.edu.cn

<sup>b</sup> Key Laboratory of Marine Chemistry Theory and Technology of Ministry of Education, Ocean University of China, Qingdao 266100, China

<sup>c</sup> School of Chemistry and Chemical Engineering, Shandong University, Qingdao, 266237, China

<sup>d</sup> Key Laboratory of Photoelectric Conversion and Utilization of Solar Energy, Qingdao Institute of Bioenergy and Bioprocess Technology, Chinese Academy of Sciences, Qingdao, 266101, China

(a)

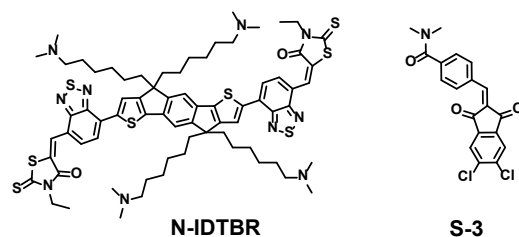

(b)

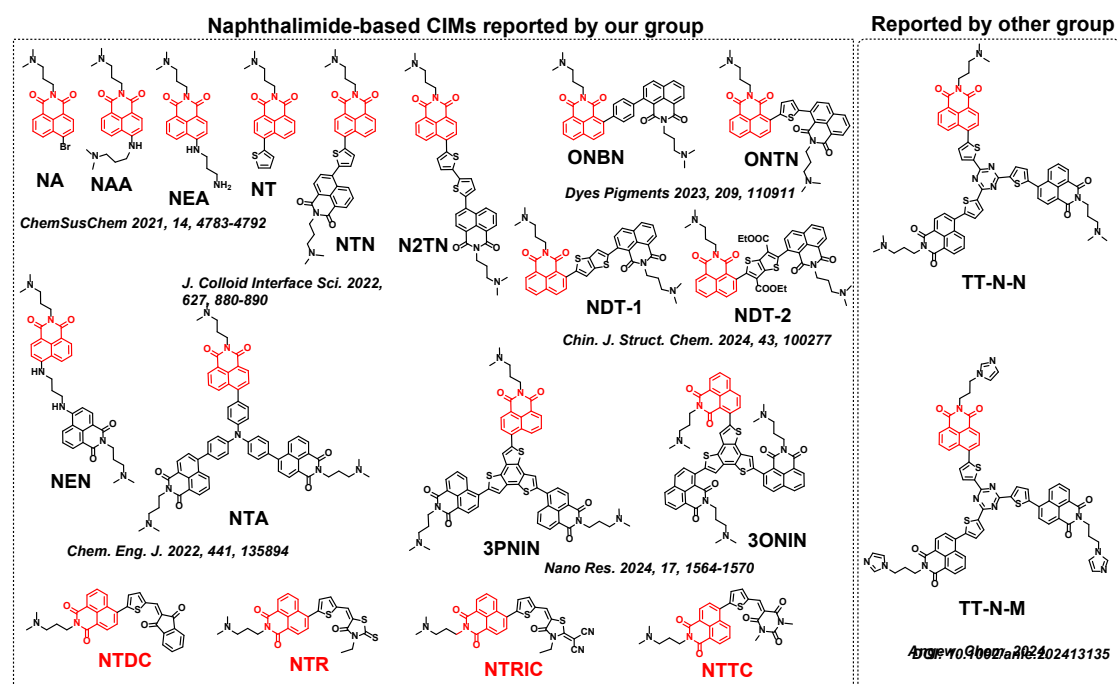

(c)

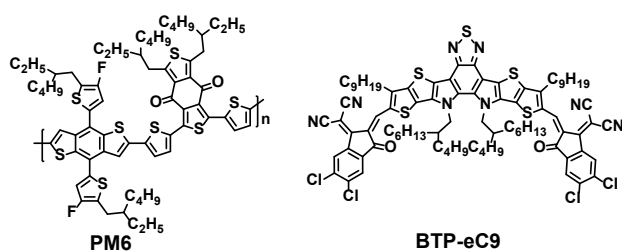

(d)

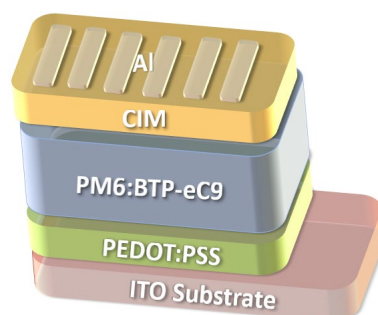

**Fig. S1** The molecular structures of (a) N-IDTBR <sup>1</sup>, S-3 <sup>2</sup>, (b) NI-based CIMs, (c) PAL materials (PM6 <sup>3</sup>, and BTP-eC9 <sup>4</sup>), and (d) PSC device structure used in this study.

## Materials

The chemical reagents and solvents used were obtained commercially. PM6 and BTP-eC9 used in this study were supplied by Derthon Optoelectronic Materials Science Technology Co., Ltd. and Solarmer Materials Inc., respectively. PEDOT: PSS (Clevios<sup>TM</sup> PVP Al 4083) was purchased from J&K Scientific.

## Methods

<sup>1</sup>H-NMR and <sup>13</sup>C-NMR were probed by a Bruker Advance III 600 MHz instrument with tetramethyl silane as the internal reference. ESI-MS mass spectrometry data was obtained on Thermo-QE plus. TGA measurements were carried out using a thermogravimetric analyzer (Netzsch TG 209 F3) under flowing nitrogen gas at a heating rate of 10 °C/min. UV-vis absorption spectra were performed on Shimadzu UV-vis 2910 spectrophotometer in chloroform solution and thin film (on a quartz substrate). Electrochemical measurements were carried out in anhydrous acetonitrile with tetra-n-butylammonium hexafluorophosphate (0.1 M) as a supporting electrolyte at a scan rate of 50 mV/s employing a computer-controlled CHI660E electrochemical workstation in three-electrode electrochemical cell (Pt wire as counter electrode, glassy carbon electrode as working electrode, and saturated Hg/HgCl electrode as reference electrode). The potentials were referenced to a ferrocenium/ferrocene (FeCp<sub>2</sub><sup>+ / 0</sup>) couple using ferrocene as an external standard. Electron paramagnetic resonance (EPR) was measured by EMXplus-6/1 (Bruker). The surface morphologies of the films were observed employing a AFM 5500 (Agilent) in the tapping mode. Film thickness of organic layer was measured by Dektak XT (Bruker).

**XRD characterization.** The XRD patterns were obtained by Bruker D8 Advance (Cu K $\alpha$  radiation). The samples are prepared on silicon substrate by spin coating. The stacking distance is calculated by Bragg's law. The calculation formula is as follows:

$$d = \frac{n\lambda}{2\sin\theta}$$

Where n equal to 1, and  $\lambda$  is 0.15406 nm.

**Fabrication and characterization of PSCs.** The devices were fabricated with the structure of ITO/PEDOT: PSS/PM6: BTP-eC9 blend/CIM/Al in the glove box. The ITO glass (sheet resistance =  $15 \Omega \text{ sq}^{-1}$ ) was precleaned in an ultrasonic bath with deionized water, acetone, and isopropanol subsequently, and treated in an UV/ozone for 5 min. PEDOT:PSS was spin-coated on ITO glass at 4000 rpm for 30 s and then annealed at  $150^\circ \text{C}$  for 15 min in air. The blend of PM6: BTP-eC9 (1:1.2, w/w,  $17 \text{ mg mL}^{-1}$  in total), which was dissolved in chloroform with 0.5% DIO (v/v), or PM6: PC<sub>61</sub>BM (1:1.5, w/w,  $18 \text{ mg mL}^{-1}$  in total in chloroform) was spin-coated on PEDOT: PSS layer (*ca.* 100 nm). Then the CIMs (NTDC, NTR, NTRIC, NTTC, NTN, and PDINO), which were dissolved in methanol with the concentration of  $1 \text{ mg mL}^{-1}$ , were spin-coated on the PM6: BTP-eC9 active layer with a thickness of 10 nm. Finally, Al was evaporated as cathode electrode (*ca.* 80 nm) under  $4 \times 10^{-4} \text{ Pa}$ . The active area of each device was  $0.05 \text{ cm}^2$ . The  $J$ - $V$  curve was measured using a computer-controlled Keithley 2400 workstation along with simulated AM 1.5G spectra ( $100 \text{ mW cm}^{-2}$ ). A  $2 \times 2 \text{ cm}^2$  monocrystalline silicon reference cell (SRC-1000-TC-QZ) was purchased from VLSI Standards Inc. The EQE spectrum was measured using a solar cell spectral response measurement system QE-R3011 (Enli Technology Ltd., Taiwan). The light intensity at each wavelength was calibrated using a standard single crystal Si photovoltaic cell.

**Mobility Measurements.** The electron-only devices of CIM neat film were fabricated using the structure of ITO/CIMs/Ag. The details are as follows: the pre-cleaned ITO glass was spin-coated with CIMs (*ca.* 60 nm), then Ag (*ca.* 80 nm) was evaporated under vacuum ( $4 \times 10^{-4} \text{ Pa}$ ).

Hole- or electron-only devices were fabricated using the structure of ITO/PEDOT: PSS/ PM6: BTP-eC9/Au for holes and ITO/ZnO/PM6: BTP-eC9/CIM/Ag for electrons. For hole-only devices, the pre-cleaned ITO glass was spin-coated with PEDOT: PSS, PM6: BTP-eC9 blend was spin-coated same as photovoltaic devices, then Au (*ca.* 80 nm) was evaporated under vacuum ( $4 \times 10^{-4} \text{ Pa}$ ). For electron-only devices, the pre-cleaned ITO glass was spin-coated with ZnO (ZnO layer was prepared with ZnO precursor solution (a mixture of zinc acetate dehydrate (100 mg), 2-methoxyethanol

(973  $\mu\text{L}$ ) and ethanolamine (28.29  $\mu\text{L}$ ) stirred overnight) at 4000 rpm, and then baked at 200  $^{\circ}\text{C}$  for 30 min), then PM6: BTP-eC9 blend and CIMs were spin-coated subsequently, then Ag (*ca.* 80 nm) was evaporated under vacuum. The mobility was extracted by fitting the current density–voltage curves via the SCLC method.<sup>5</sup> The calculation formula is as follows:

$$J = \frac{9\varepsilon_0\varepsilon_r\mu V^2}{8d^3}$$

Where  $J$  represents the current density,  $\varepsilon_r$  and  $\varepsilon_0$  are the relative dielectric and vacuum dielectric constant, respectively,  $V$  is the voltage drop, and  $d$  is *ca.* 80 nm.

**EIS test.** EIS test was conducted on the CHI660E electrochemical workstation in two-electrode system. The device preparation for EIS test is consistent with  $J$ - $V$  characterization. The working electrode is connected to ITO (as positive electrode), and the counter electrode and reference electrode are connected to Ag electrode (as negative electrode) at the same time, and a bias voltage equal to  $V_{\text{OC}}$  was applied to dissipate the total current.

**Conductivity measurements.** The films of CIMs were spin-coated on substrates at a film thickness ( $T$ ) of *ca.* 50 nm. The parallel aluminum electrodes (*ca.* 80 nm) at length ( $L$ ) of 12 mm were evaporated on CIMs. The separation distance ( $D$ ) between the two parallel electrodes was 1 mm. Conductivity measurements were carried out using a Keithley 2400 workstation. The calculation formula is as follows:

$$\sigma = ID/VLT$$

## Synthesis of NTDC, NTR, NTRIC, and NTTC.

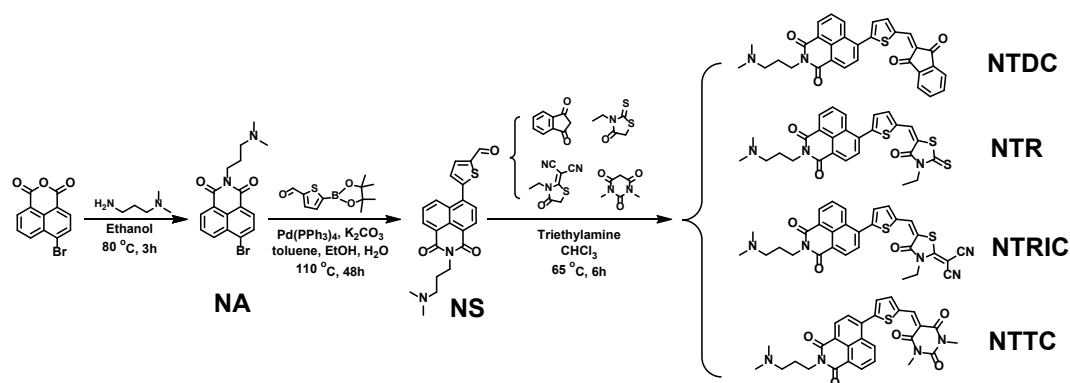

**Fig. S2** Synthesis routes of NTDC, NTR, NTRIC, and NTTC.

*Synthesis of NS:* The NA intermediate was synthesized according to previously reported method.<sup>6</sup> NA (500 mg, 1.38 mmol), 5-(4,4,5,5-tetramethyl-1,3,2-dioxaborolan-2-yl) thiophene-2-carbaldehyde (395.49 mg, 1.66 mmol), toluene (15 mL) EtOH (5 mL) and saturated K<sub>2</sub>CO<sub>3</sub> solution (2 mL) were mixed in a two-neck round-bottomed flask. Then Pd(PPh<sub>3</sub>)<sub>4</sub> (45 mg, 0.039 mmol) was added after the degasification with dry nitrogen. Then the mixture was stirred at 110 °C for 48 hours under a nitrogen atmosphere. After the mixture was cooled to room temperature, the crude product was purified by extraction and silica gel column chromatography with methanol/chloroform (1:3, v/v) as eluent. The yellow solid NS was obtained with a yield of 70%. <sup>1</sup>H NMR (600 MHz, CDCl<sub>3</sub>) δ 10.00 (s, 1H), 8.65 (d, *J* = 7.2 Hz, 1H), 8.62 (d, *J* = 7.5 Hz, 1H), 8.51 (d, *J* = 8.5 Hz, 1H), 7.89 (d, *J* = 3.8 Hz, 1H), 7.84 (d, *J* = 7.5 Hz, 1H), 7.79 (t, *J* = 7.9 Hz, 1H), 7.43 (d, *J* = 3.8 Hz, 1H), 4.25 (t, *J* = 7.5 Hz, 2H), 2.52 (t, *J* = 7.4 Hz, 2H), 2.31 (s, 6H), 1.99-1.95 (m, 2H). <sup>13</sup>C NMR (151 MHz, CDCl<sub>3</sub>) δ 181.86, 162.94, 162.66, 148.21, 143.99, 136.40, 135.46, 130.68, 130.58, 129.51, 128.73, 128.63, 127.89, 127.67, 126.78, 122.13, 122.00, 55.93, 43.98, 37.72, 28.68.

*Synthesis of NTDC:* A mixture of NS (300 mg, 0.76 mmol), 1,3-indanedione (134.05 mg, 0.92 mmol), CHCl<sub>3</sub> (15 mL) and triethylamine (1 mL) in a two-neck round bottomed flask was stirred at 65 °C for 6 hours. After the mixture was cooled to room temperature and removed the solvent, the crude product was purified by silica gel

column chromatography with methanol/chloroform (1:5, v/v) as eluent. The yellow-green solid **NTDC** was obtained with a yield of 75%.  $^1\text{H}$  NMR (600 MHz,  $\text{CDCl}_3$ )  $\delta$  8.68 (d,  $J$  = 8.4 Hz, 1H), 8.65 (d,  $J$  = 7.5 Hz, 1H), 8.62 (d,  $J$  = 8.5 Hz, 1H), 8.10 (d,  $J$  = 4.0 Hz, 1H), 8.05 (s, 1H), 8.03-7.99 (m, 2H), 7.95 (d,  $J$  = 7.6 Hz, 1H), 7.83 (s, 1H), 7.82 (d,  $J$  = 5.5 Hz, 2H), 7.49 (d,  $J$  = 3.9 Hz, 1H), 4.28 (t,  $J$  = 7.5 Hz, 2H), 2.59 (t,  $J$  = 7.3 Hz, 2H), 2.38 (s, 6H), 2.05-2.01 (m, 2H).  $^{13}\text{C}$  NMR (151 MHz,  $\text{CDCl}_3$ )  $\delta$  189.99, 189.62, 164.04, 163.78, 151.85, 142.19, 142.10, 140.58, 139.01, 137.78, 135.46, 135.41, 135.26, 131.89, 131.67, 130.58, 130.09, 129.67, 128.98, 128.82, 127.79, 125.59, 123.31, 123.15, 123.05, 122.97, 57.05, 44.99, 38.74, 25.63. ESI-MS ( $m/z$ ):  $[\text{M} + \text{H}]^+$  calculated for  $\text{C}_{31}\text{H}_{24}\text{N}_2\text{O}_4\text{S}$ : 521.60, found: 521.15.

*Synthesis of NTR*: A mixture of **NS** (260 mg, 0.66 mmol), 3-ethylrhodanine (128.18 mg, 0.80 mmol),  $\text{CHCl}_3$  (15 mL), triethylamine (2 mL) in a two-neck round bottomed flask was stirred at 65 °C for 6 hours. After removing the solvent, the crude product was purified by silica gel column chromatography with methanol/chloroform (1:3, v/v) as eluent. The dark orange solid **NTR** was obtained with a yield of 72%.  $^1\text{H}$  NMR (600 MHz,  $\text{CDCl}_3$ )  $\delta$  8.67 (d,  $J$  = 7.2 Hz, 1H), 8.63 (d,  $J$  = 7.5 Hz, 1H), 8.59 (d,  $J$  = 8.3 Hz, 1H), 7.93 (s, 1H), 7.88 (d,  $J$  = 7.5 Hz, 1H), 7.82 (t,  $J$  = 7.9 Hz, 1H), 7.54 (d,  $J$  = 3.9 Hz, 1H), 7.44 (d,  $J$  = 3.9 Hz, 1H), 4.29 (t,  $J$  = 7.2 Hz, 2H), 4.21 (q,  $J$  = 7.2 Hz, 2H), 2.77 (t,  $J$  = 7.5 Hz, 2H), 2.52 (s, 6H), 2.13-2.09 (m, 2H), 1.31 (t,  $J$  = 7.2 Hz, 3H).  $^{13}\text{C}$  NMR (151 MHz,  $\text{CDCl}_3$ )  $\delta$  191.70, 167.28, 163.99, 163.71, 147.03, 139.92, 137.39, 134.25, 131.66, 131.63, 130.57, 130.44, 129.58, 128.86, 128.76, 127.76, 124.34, 123.15, 122.93, 122.57, 57.17, 45.23, 40.06, 38.88, 25.90, 12.30. ESI-MS ( $m/z$ ):  $[\text{M} + \text{H}]^+$  calculated for  $\text{C}_{27}\text{H}_{25}\text{N}_3\text{O}_3\text{S}_3$ : 536.70, found: 536.11.

*Synthesis of NTRIC*: A mixture of **NS** (240 mg, 0.61 mmol), 2-(3-ethyl-4-oxothiazolidin-2-ylidene)malononitrile (141.79 mg, 0.73 mmol),  $\text{CHCl}_3$  (15 mL), triethylamine (1.5 mL) in a two-neck round bottomed flask was stirred at 65 °C for 6 hours. Then the mixture was cooled to room temperature and removed the solvent, the crude product was purified by silica gel column chromatography with methanol/dichloromethane (1:5, v/v) as eluent. The red solid **NTRIC** was obtained with

a yield of 69%.  $^1\text{H}$  NMR (600 MHz,  $\text{CDCl}_3$ )  $\delta$  8.68 (d,  $J = 7.4$  Hz, 1H), 8.64 (d,  $J = 7.5$  Hz, 1H), 8.55 (d,  $J = 8.4$  Hz, 1H), 8.15 (s, 1H), 7.90 (d,  $J = 7.5$  Hz, 1H), 7.84 (t,  $J = 7.9$  Hz, 1H), 7.62 (d,  $J = 4.1$  Hz, 1H), 7.49 (d,  $J = 4.1$  Hz, 1H), 4.35 (q,  $J = 7.2$  Hz, 2H), 4.29 (t,  $J = 7.2$  Hz, 2H), 2.81 (t,  $J = 7.7$  Hz, 2H), 2.54 (s, 6H), 2.15-2.10 (m, 2H), 1.43 (t,  $J = 7.2$  Hz, 3H).  $^{13}\text{C}$  NMR (151 MHz,  $\text{CDCl}_3$ )  $\delta$  165.78, 165.12, 163.97, 163.69, 147.93, 138.66, 137.03, 135.39, 131.87, 131.64, 130.80, 130.68, 129.55, 129.05, 128.85, 128.05, 127.99, 123.00, 115.82, 112.92, 111.91, 56.57, 44.24, 40.86, 38.33, 29.71, 24.84, 14.22. ESI-MS ( $m/z$ ):  $[\text{M} + \text{H}]^+$  calculated for  $\text{C}_{30}\text{H}_{25}\text{N}_5\text{O}_3\text{S}_2$ : 568.68, found: 568.15.

*Synthesis of NTTC*: A mixture of NS (200 mg, 0.51 mmol), 1,3-dimethylbarbituric acid (95.48 mg, 0.61 mmol),  $\text{CHCl}_3$  (15 mL), triethylamine (1 mL) in a two-neck round bottomed flask was stirred at 65 °C for 6 hours. After removing the solvent, the crude product was purified by silica gel column chromatography with methanol/chloroform (1:5, v/v) as eluent. The orange solid NTTC was obtained with a yield of 77%.  $^1\text{H}$  NMR (600 MHz,  $\text{CDCl}_3$ )  $\delta$  8.77 (s, 1H), 8.67 (d,  $J = 7.3$  Hz, 1H), 8.63 (d,  $J = 7.5$  Hz, 1H), 8.58 (d,  $J = 8.5$  Hz, 1H), 8.00 (d,  $J = 4.0$  Hz, 1H), 7.95 (d,  $J = 7.6$  Hz, 1H), 7.85-7.81 (m, 1H), 7.53 (d,  $J = 3.9$  Hz, 1H), 4.33 (t,  $J = 6.9$  Hz, 2H), 3.45 (d,  $J = 11.5$  Hz, 6H), 3.13 (t,  $J = 7.9$  Hz, 2H), 2.80 (s, 6H), 2.30 (t,  $J = 7.9$  Hz, 2H).  $^{13}\text{C}$  NMR (151 MHz,  $\text{CDCl}_3$ )  $\delta$  164.07, 163.82, 162.44, 161.98, 155.01, 151.20, 148.32, 145.47, 138.41, 138.06, 132.22, 131.97, 130.78, 129.82, 129.67, 129.10, 128.79, 127.93, 122.71, 122.66, 111.32, 56.22, 43.47, 37.71, 29.06, 28.26. ESI-MS ( $m/z$ ):  $[\text{M} + \text{H}]^+$  calculated for  $\text{C}_{28}\text{H}_{26}\text{N}_4\text{O}_5\text{S}$ : 531.60, found: 531.17.

**NMR spectra of NS, NTDC, NTR, NTRIC, and NTTC.**

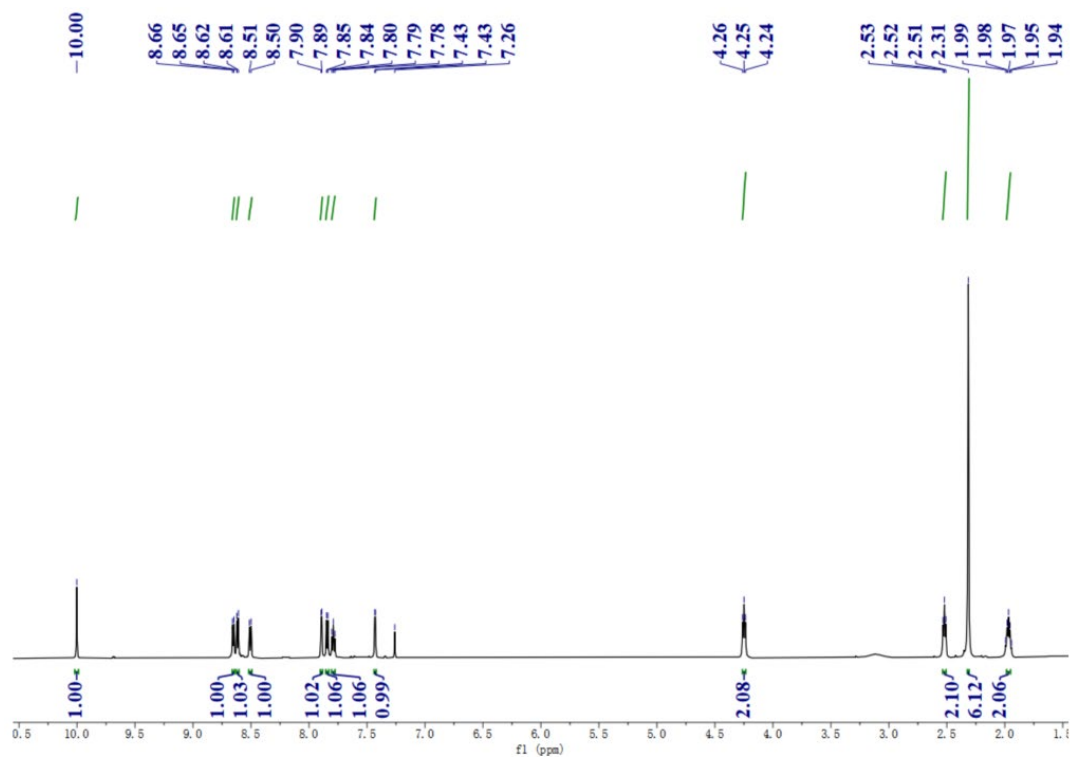

**Fig. S3** <sup>1</sup>H NMR spectrum of NS.

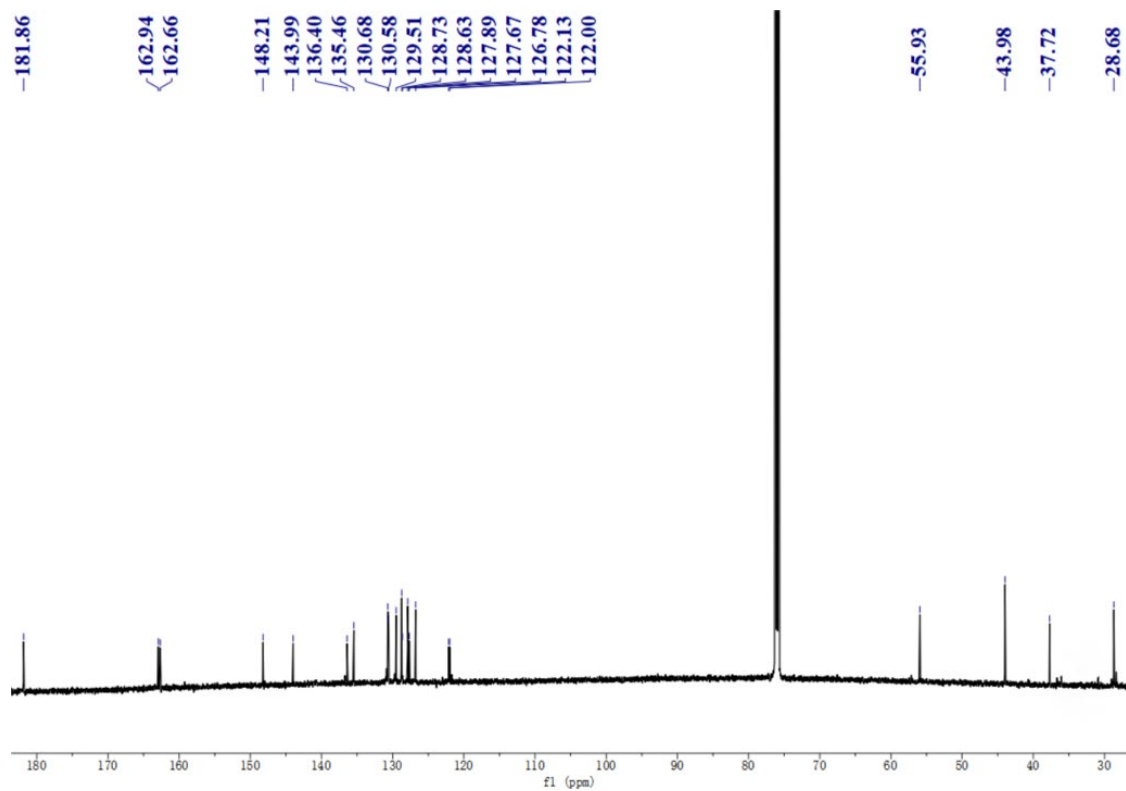

**Fig. S4** <sup>13</sup>C NMR spectrum of NS.

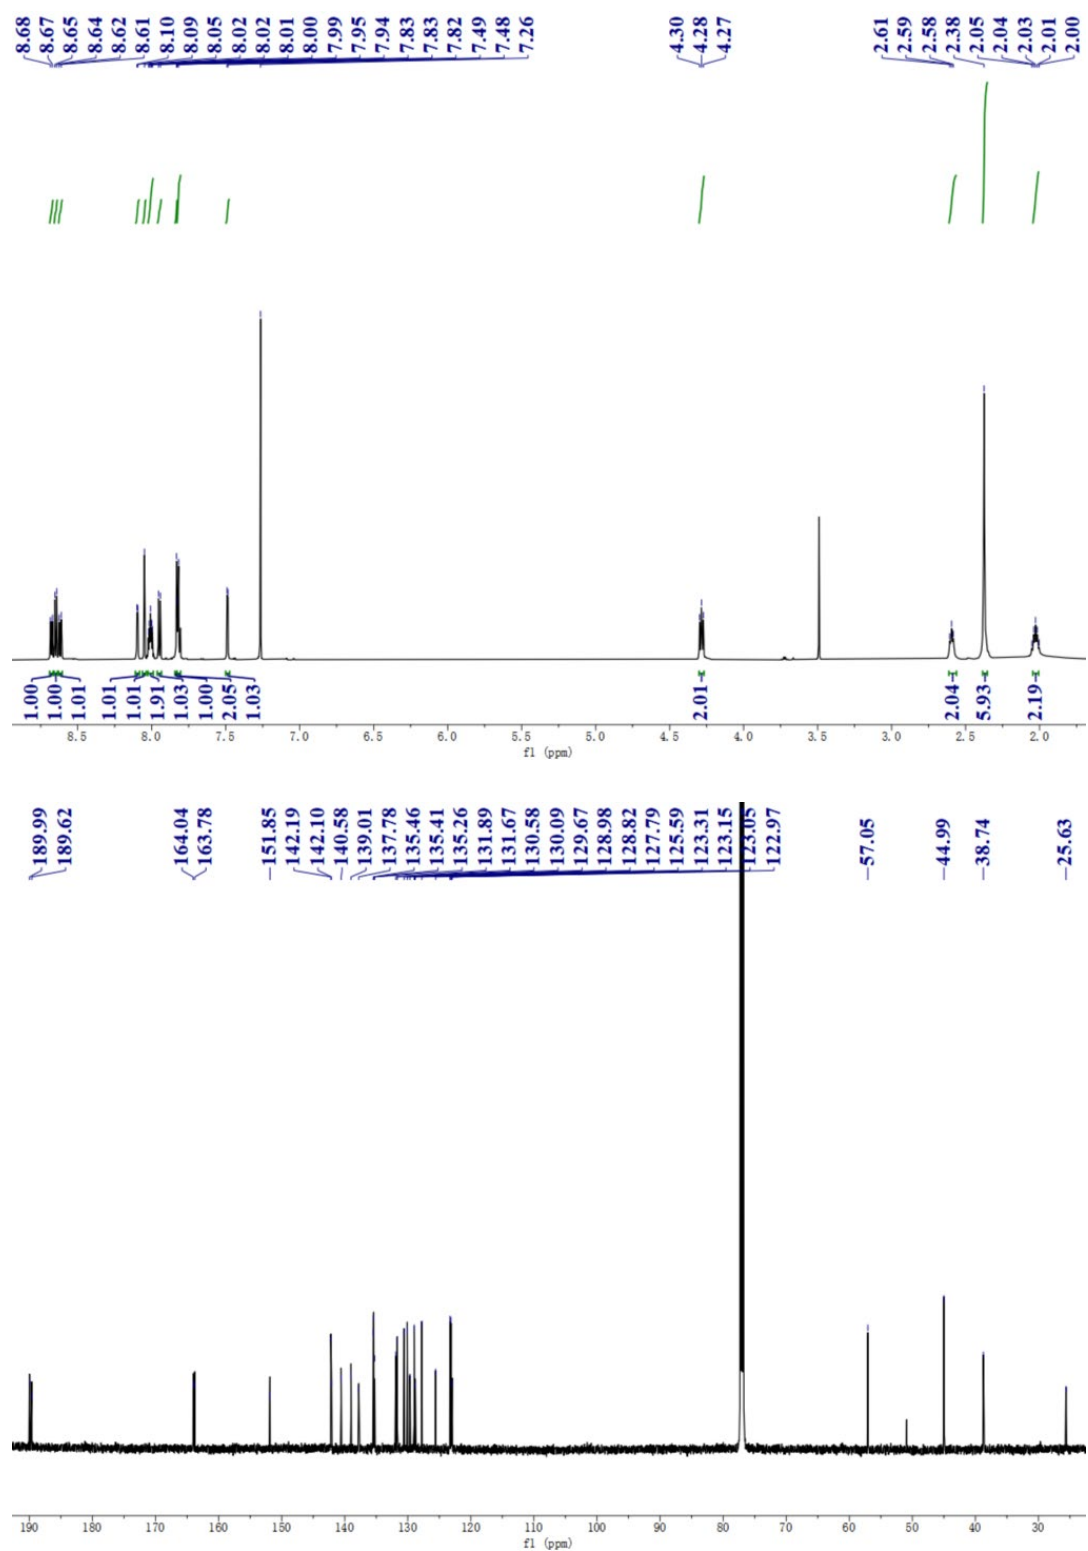

**Fig. S5** <sup>1</sup>H NMR (top) and <sup>13</sup>C NMR (bottom) spectra of NTDC.

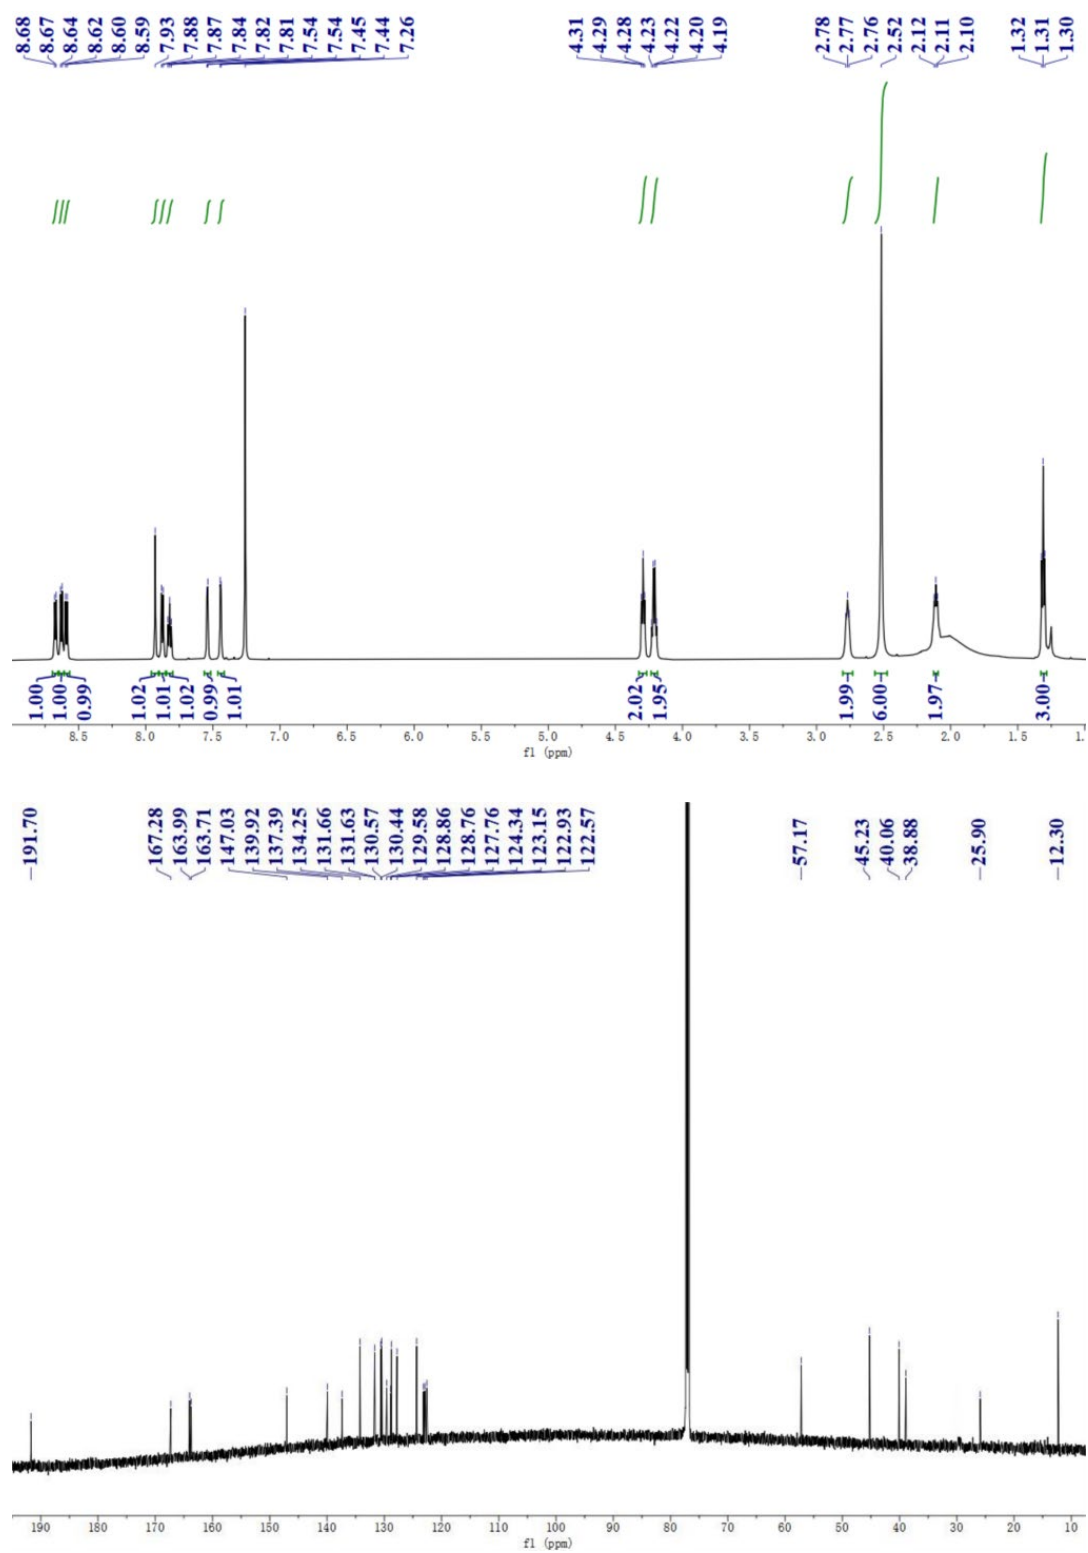

**Fig. S6** <sup>1</sup>H NMR (top) and <sup>13</sup>C NMR (bottom) spectra of NTR.

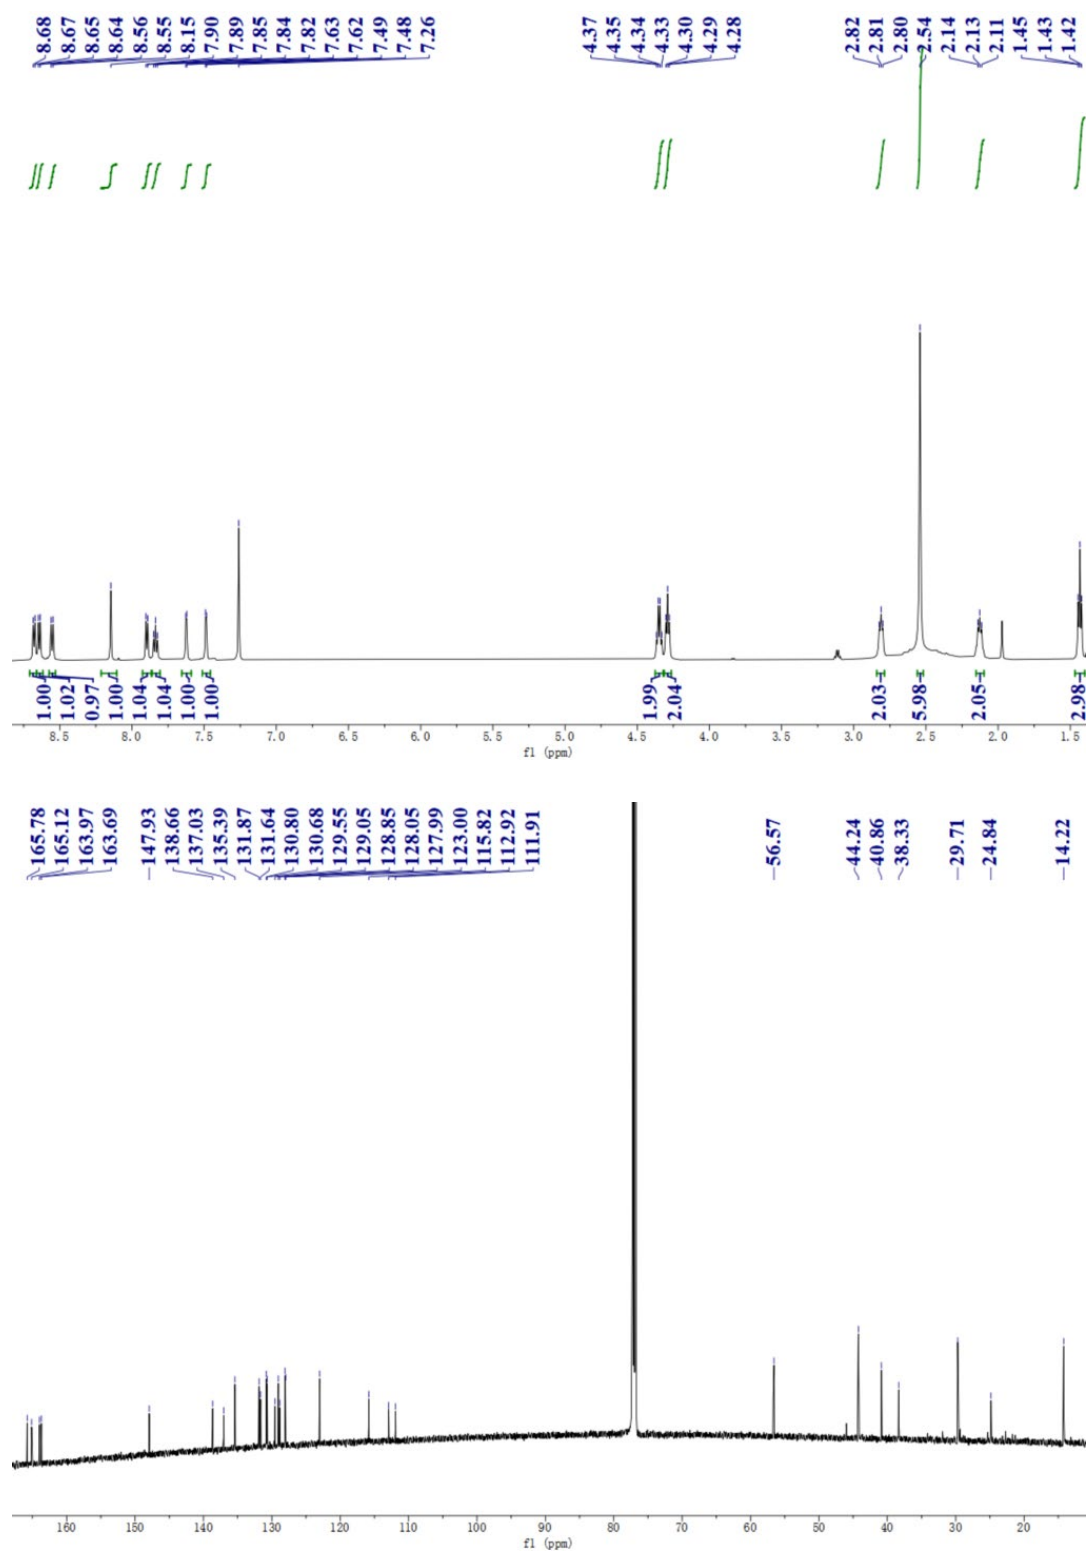

**Fig. S7**  $^1\text{H}$  NMR (top) and  $^{13}\text{C}$  NMR (bottom) spectra of NTRIC.

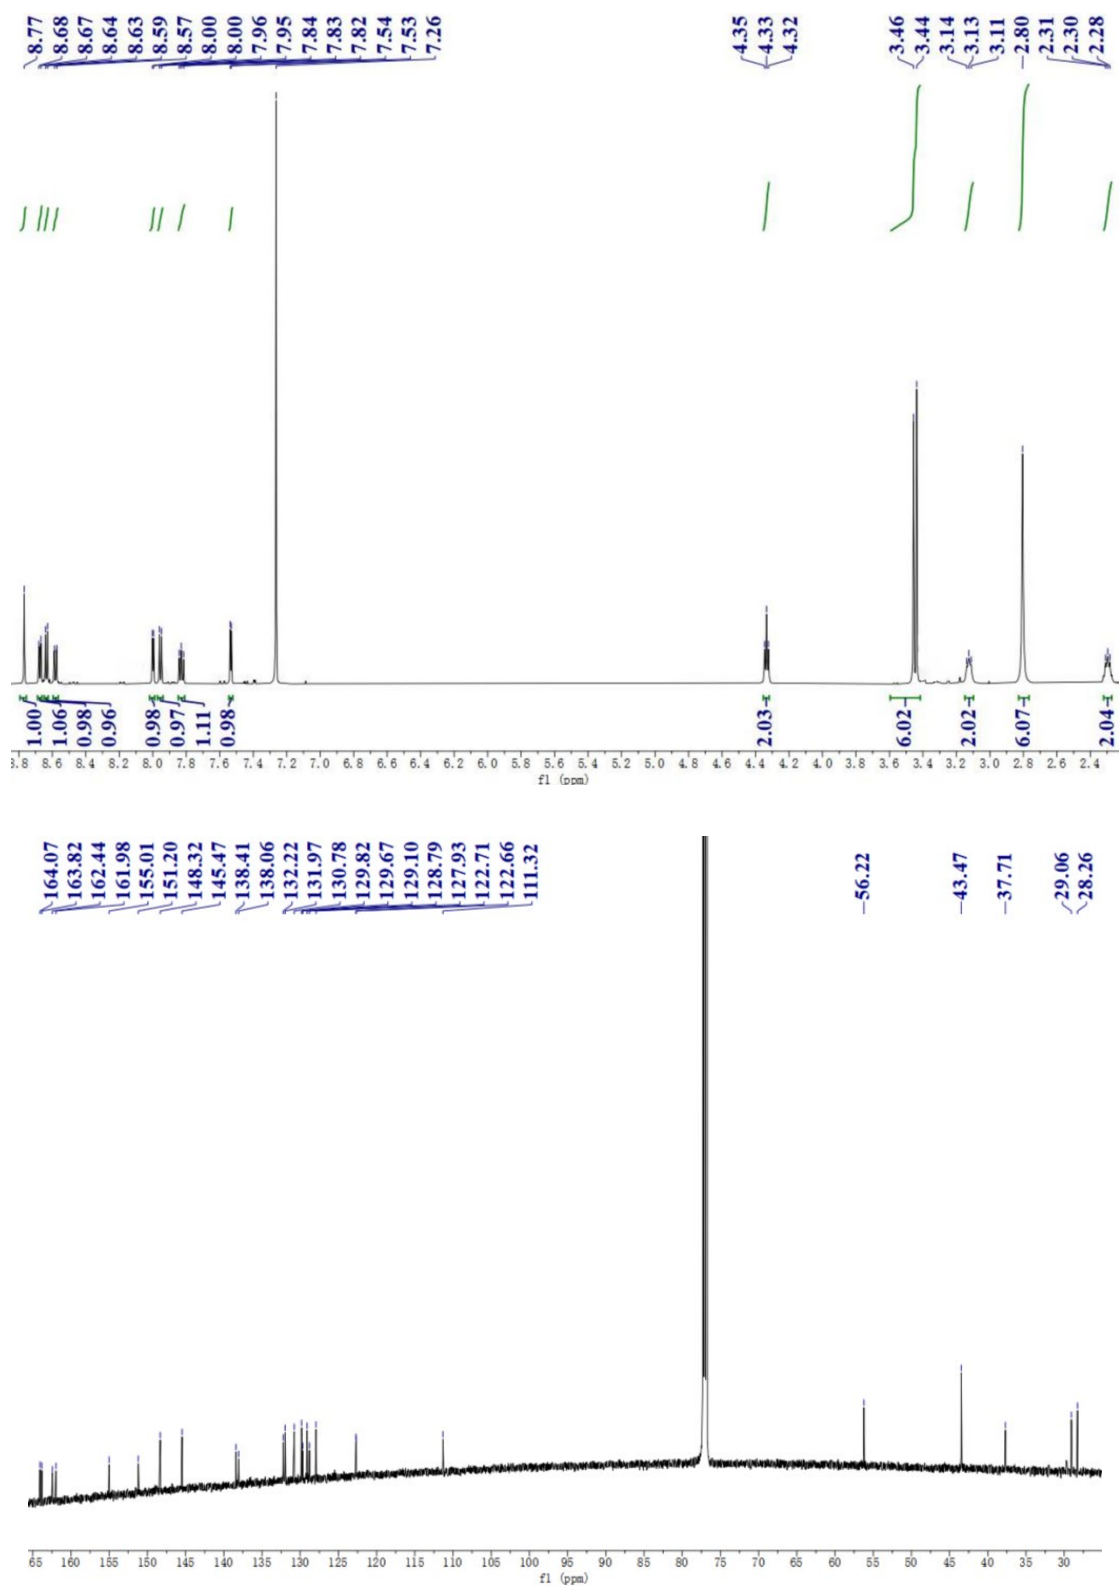

**Fig. S8**  $^1\text{H}$  NMR (top) and  $^{13}\text{C}$  NMR (bottom) spectra of NTTC.

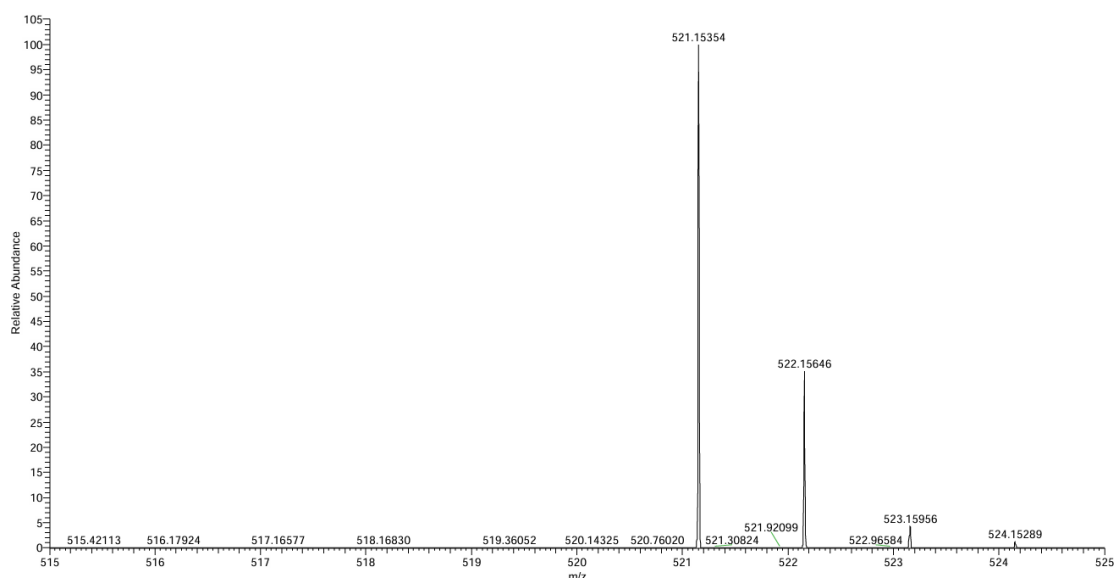

**Fig. S9** ESI-MS Mass spectrum of NTDC.

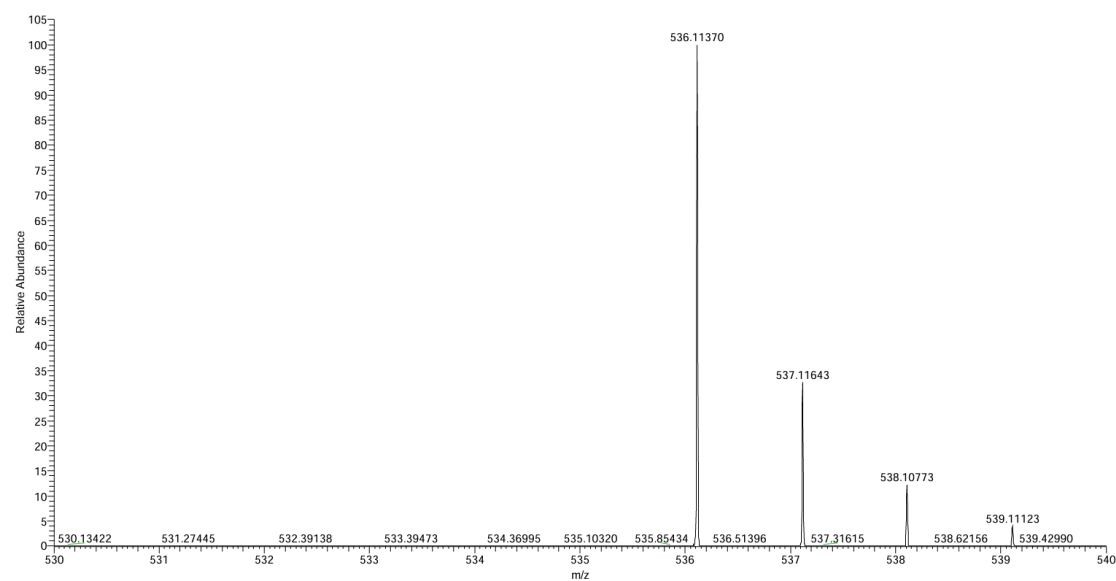

**Fig. S10** ESI-MS Mass spectrum of NTR.

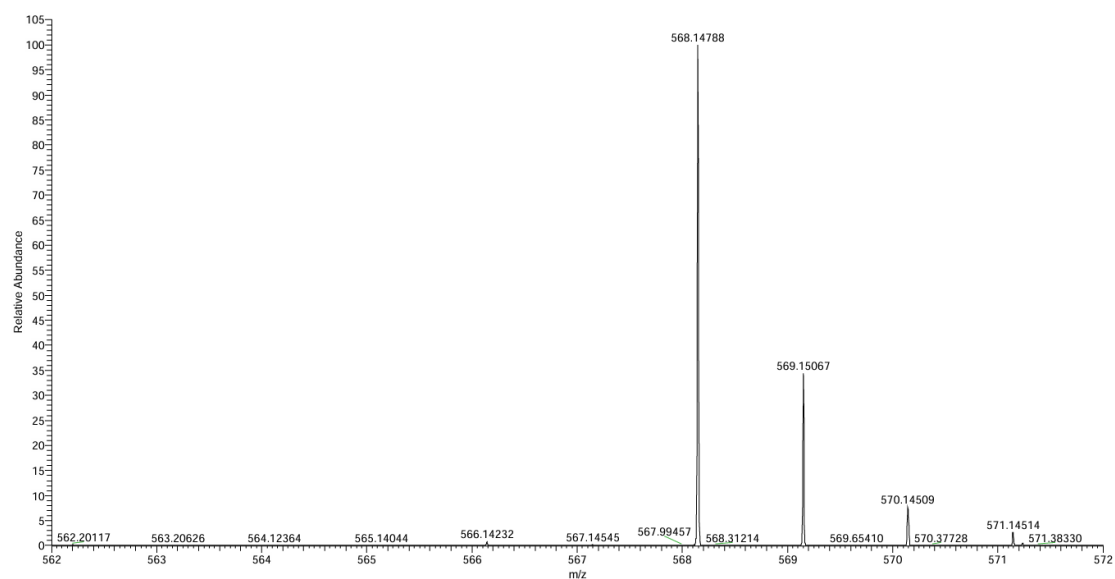

**Fig. S11** ESI-MS Mass spectrum of NTRIC.

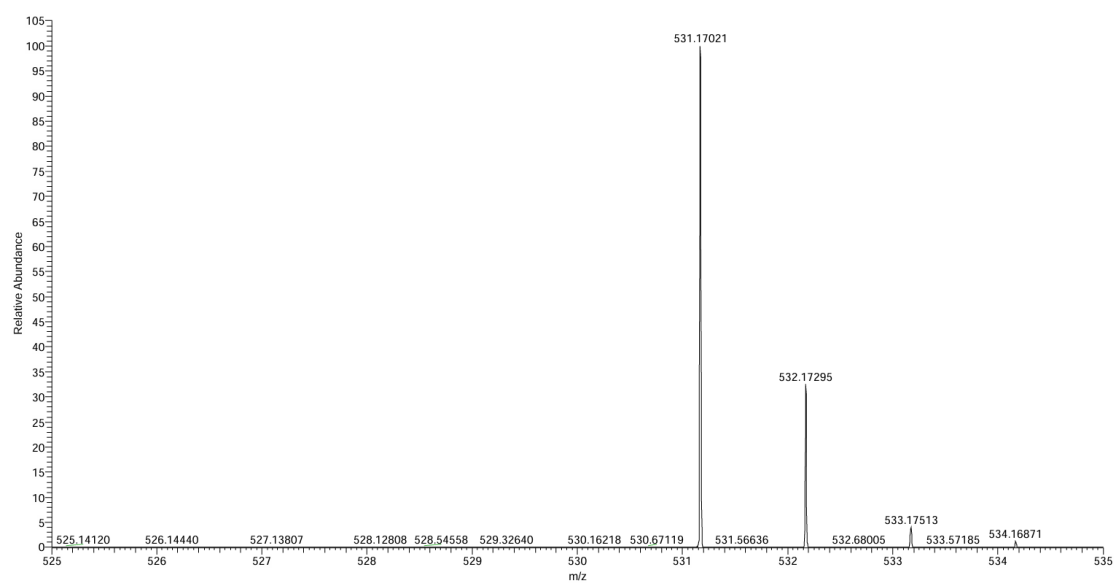

**Fig. S12** ESI-MS Mass spectrum of NTTC.

## Characterization

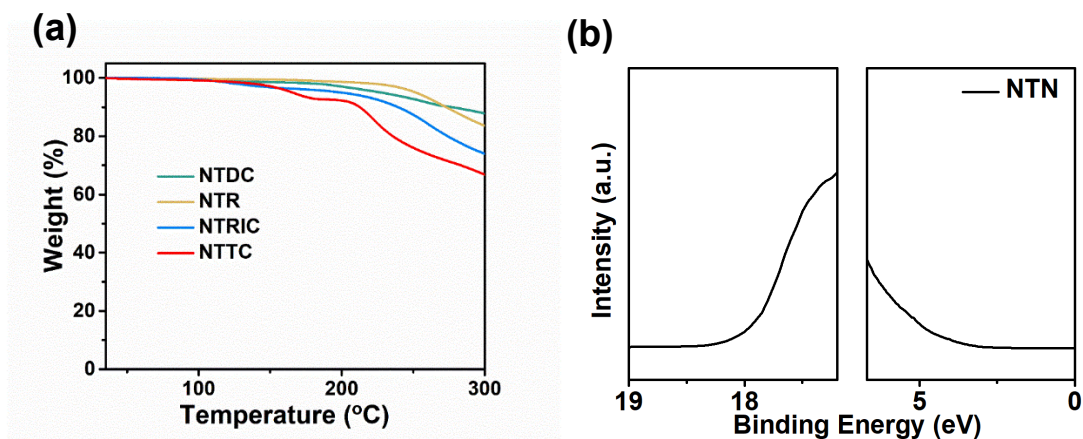

**Fig. S13** (a) TGA spectra of NTDC, NTR, NTRIC, and NTTC, (b) UPS data of NTN.

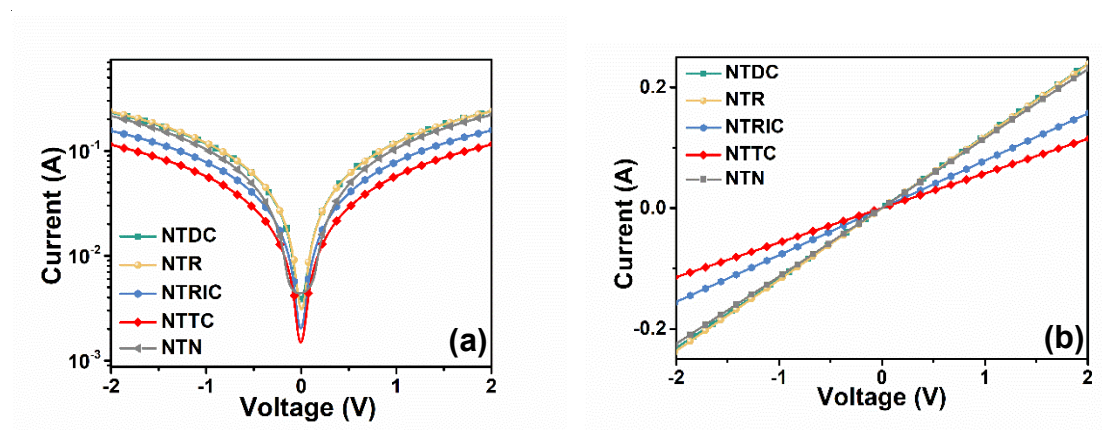

**Fig. S14** (a)  $I$ - $V$  tests of pure films on parallel Al electrode, and (b)  $I$ - $V$  measurements data are plotted on linear-linear scale for NTDC, NTR, NTRIC, NTTC, and NTN, respectively.

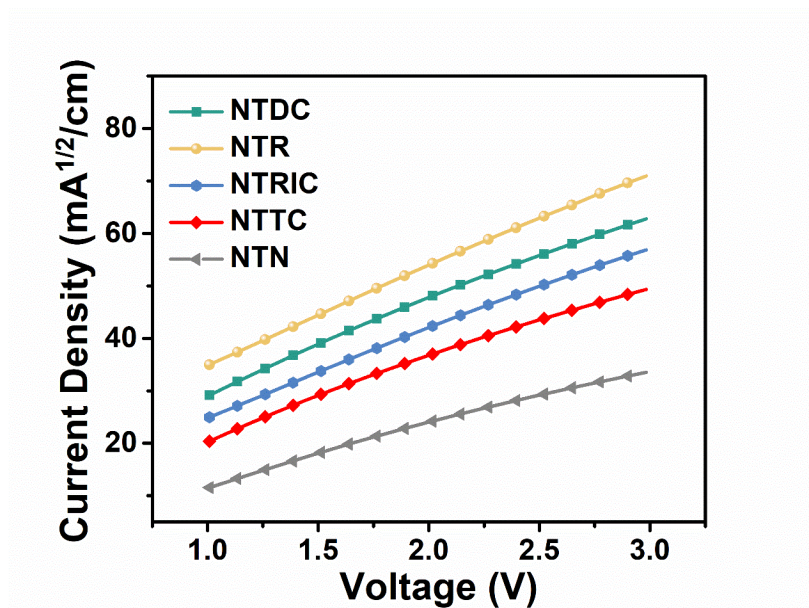

**Fig. S15**  $J$ - $V$  characteristics in the dark for electron-only devices based on NTDC, NTR, NTRIC, NTTC, and NTN, respectively.

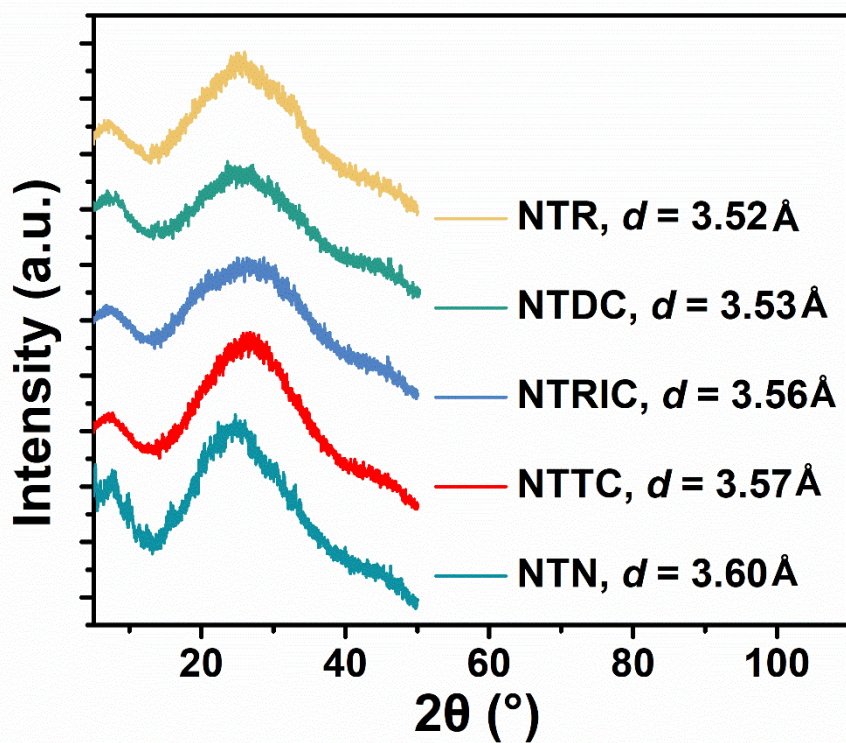

**Fig. S16** XRD patterns and  $\pi$ - $\pi$  stacking distances of NTR, NTDC, NTRIC, NTTC, and NTN.

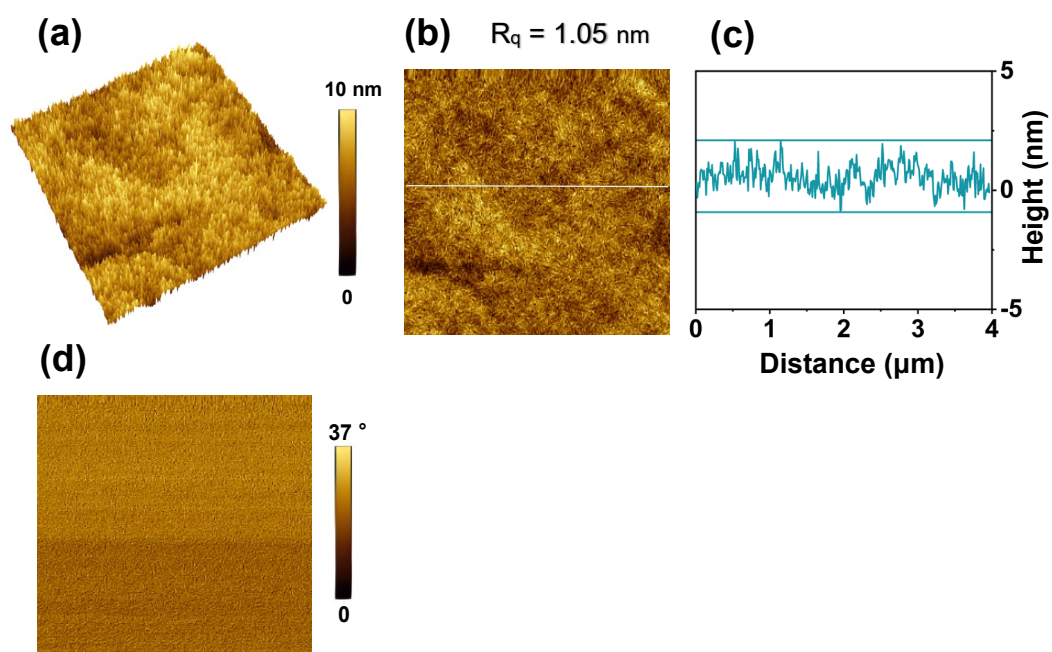

**Fig. S17** AFM 3D image of roughness morphology (a), height image (b), roughness (c), and phase image (d) of NTN. The scale of image is  $4.0 \mu\text{m} \times 4.0 \mu\text{m}$ .

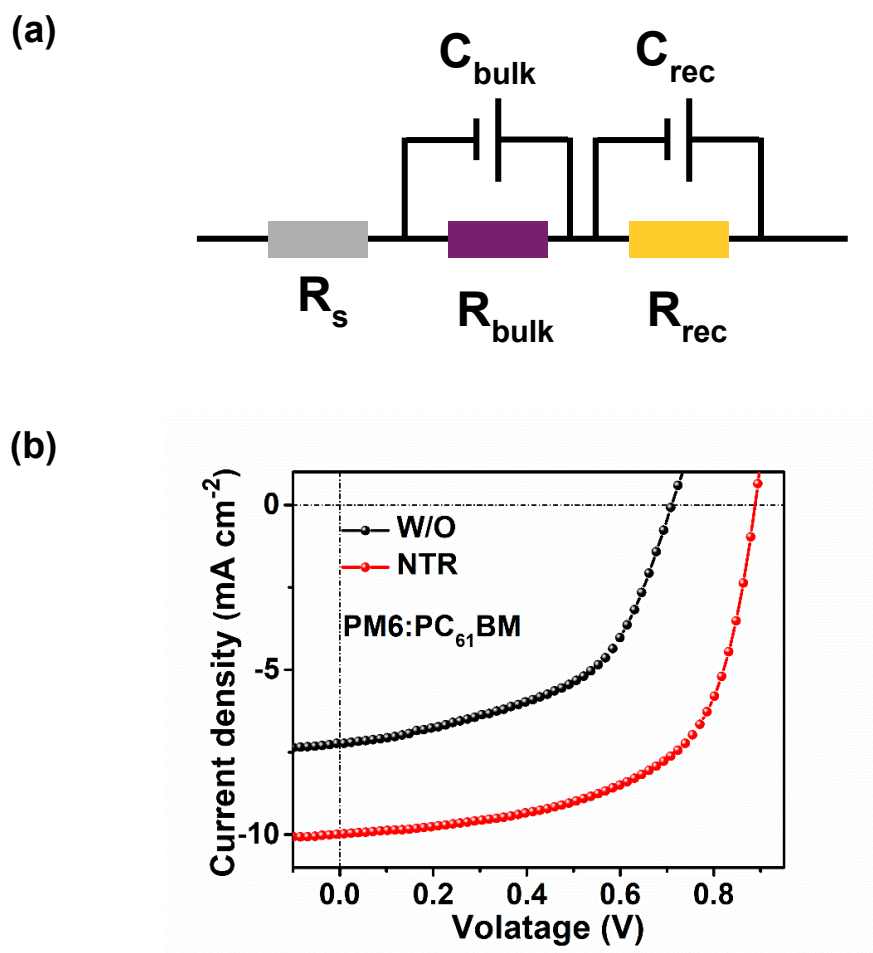

**Fig. S18** Equivalent circuit diagram that be adopted for fitting the EIS spectroscopy (a), and photovoltaic performance of PM6:PC<sub>61</sub>BM -based devices with or without NTR interlayer (b).

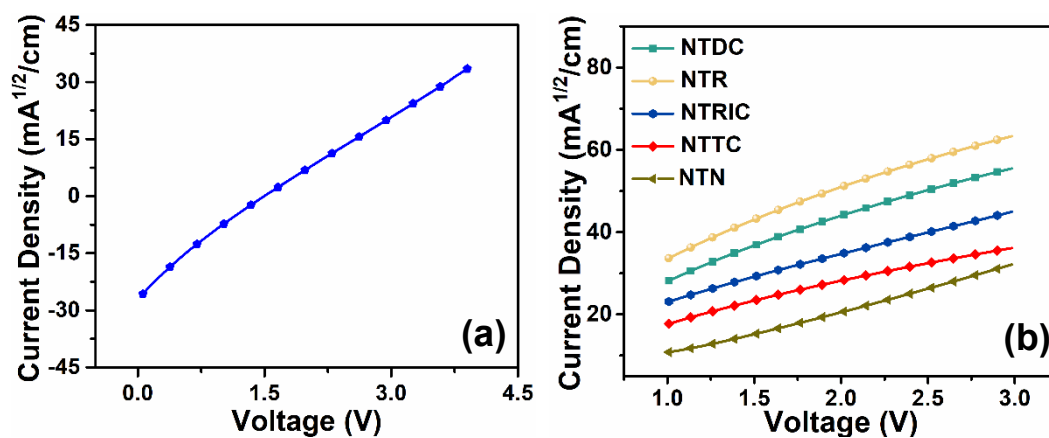

**Fig. S19**  $J-V$  characteristics in the dark for hole-only device (a), and electron-only devices (b) based on NTDC, NTR, NTRIC, NTTC, and NTN, respectively.

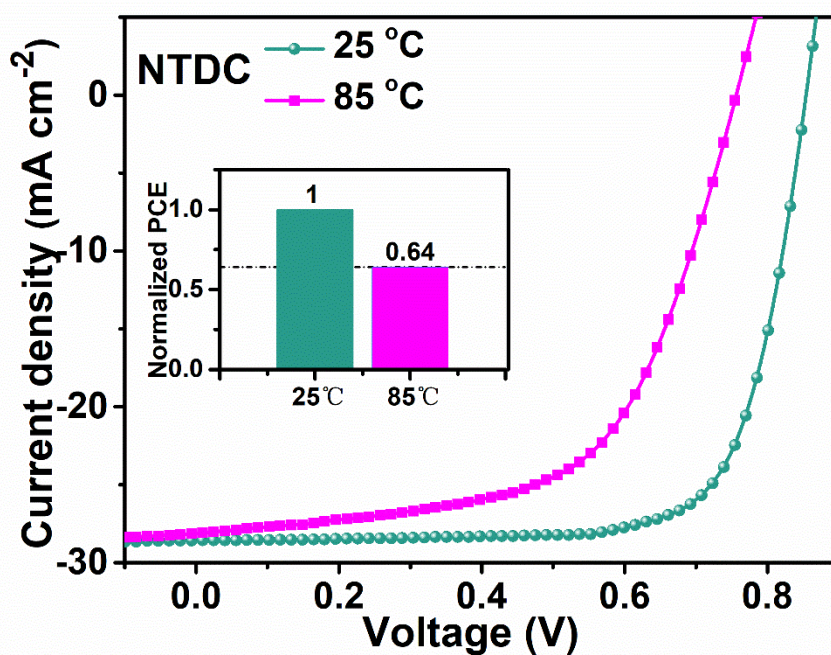

**Fig. S20** Photovoltaic performances of the optimized fresh (25°C) and aged (85°C) PSCs with NTDC interlayer.

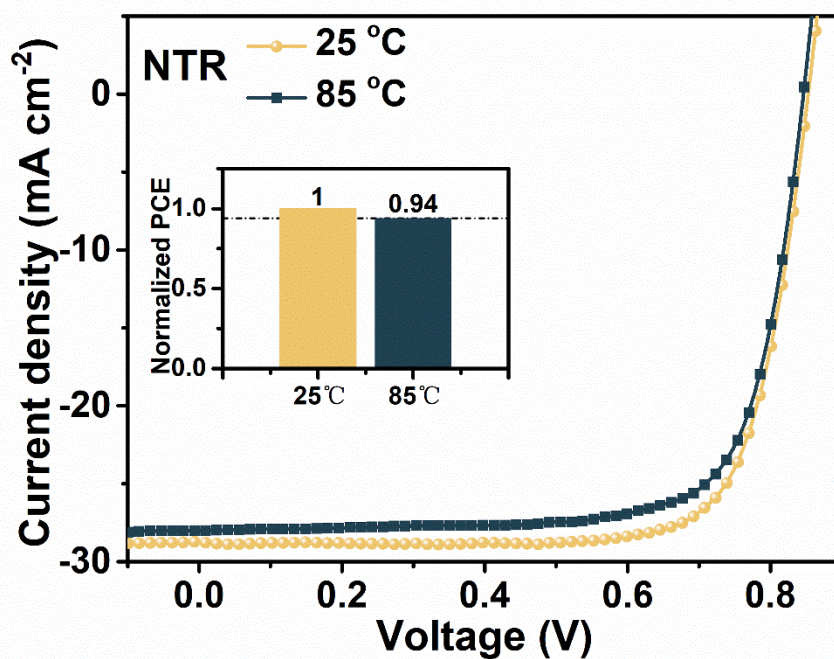

**Fig. S21** Photovoltaic performances of the optimized fresh and aged PSCs with NTR interlayer.

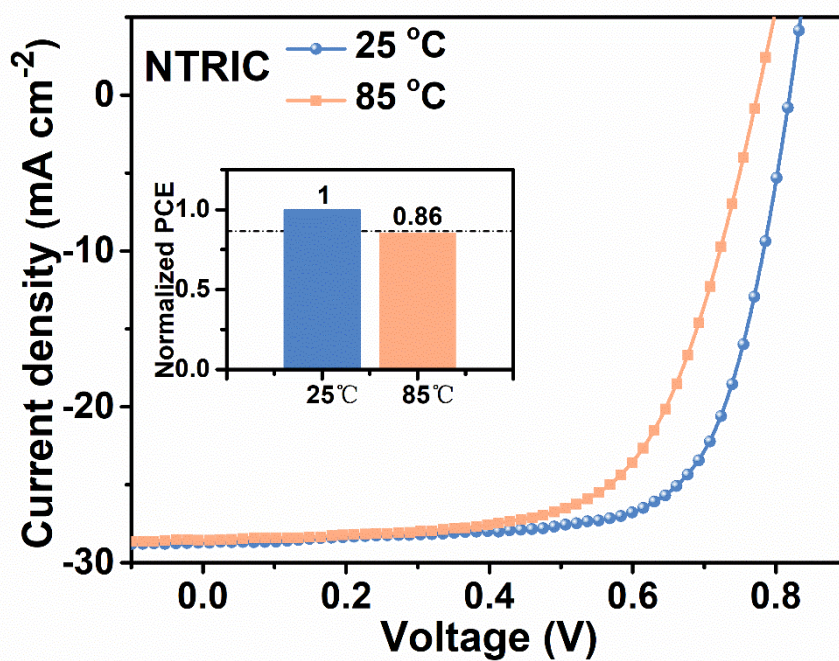

**Fig. S22** Photovoltaic performances of the optimized fresh and aged PSCs with NTRIC interlayer.

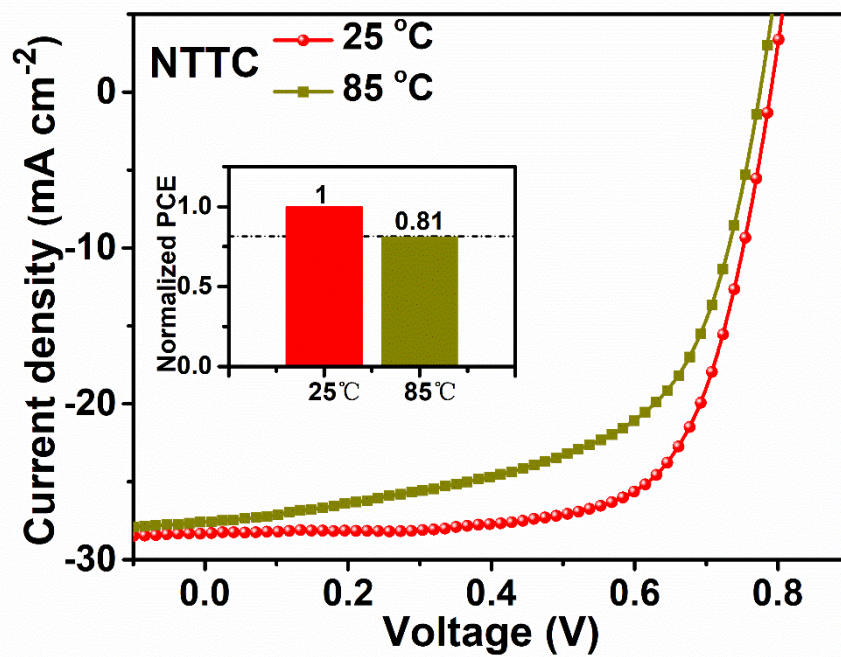

**Fig. S23** Photovoltaic performances of the optimized fresh and aged PSCs with NTTC interlayer.

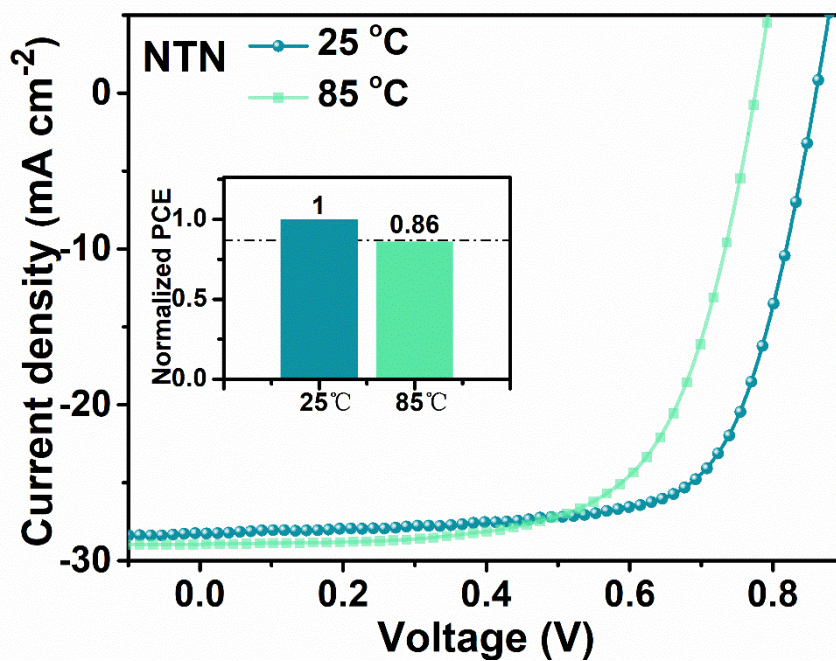

**Fig. S24** Photovoltaic performances of the optimized fresh and aged PSCs with NTN interlayer.

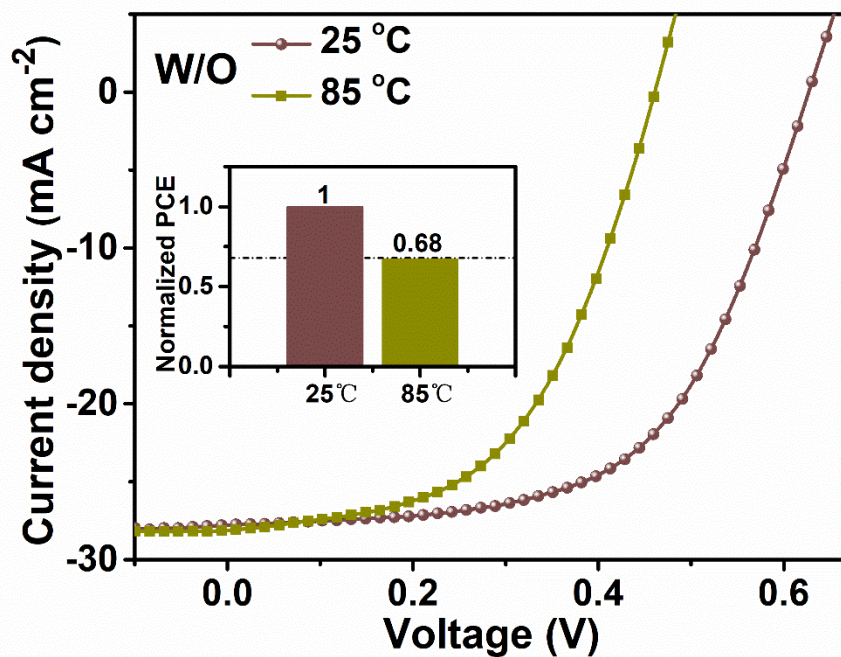

**Fig. S25** Photovoltaic performances of the optimized fresh and aged PSCs without CIM.

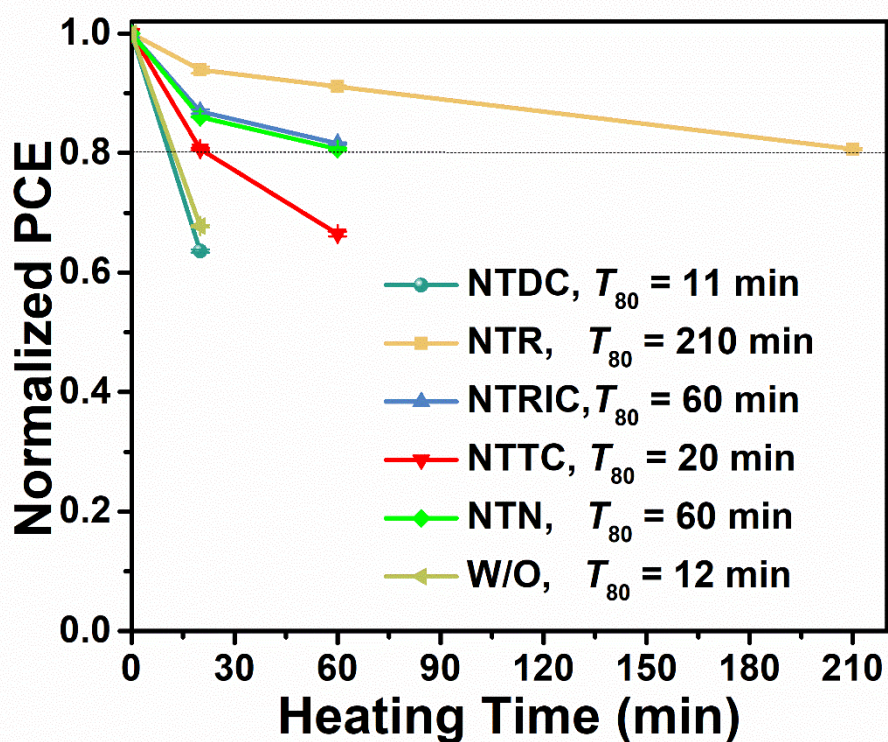

**Fig. S26**  $T_{80}$  of the optimized aged PSCs at 85 °C.

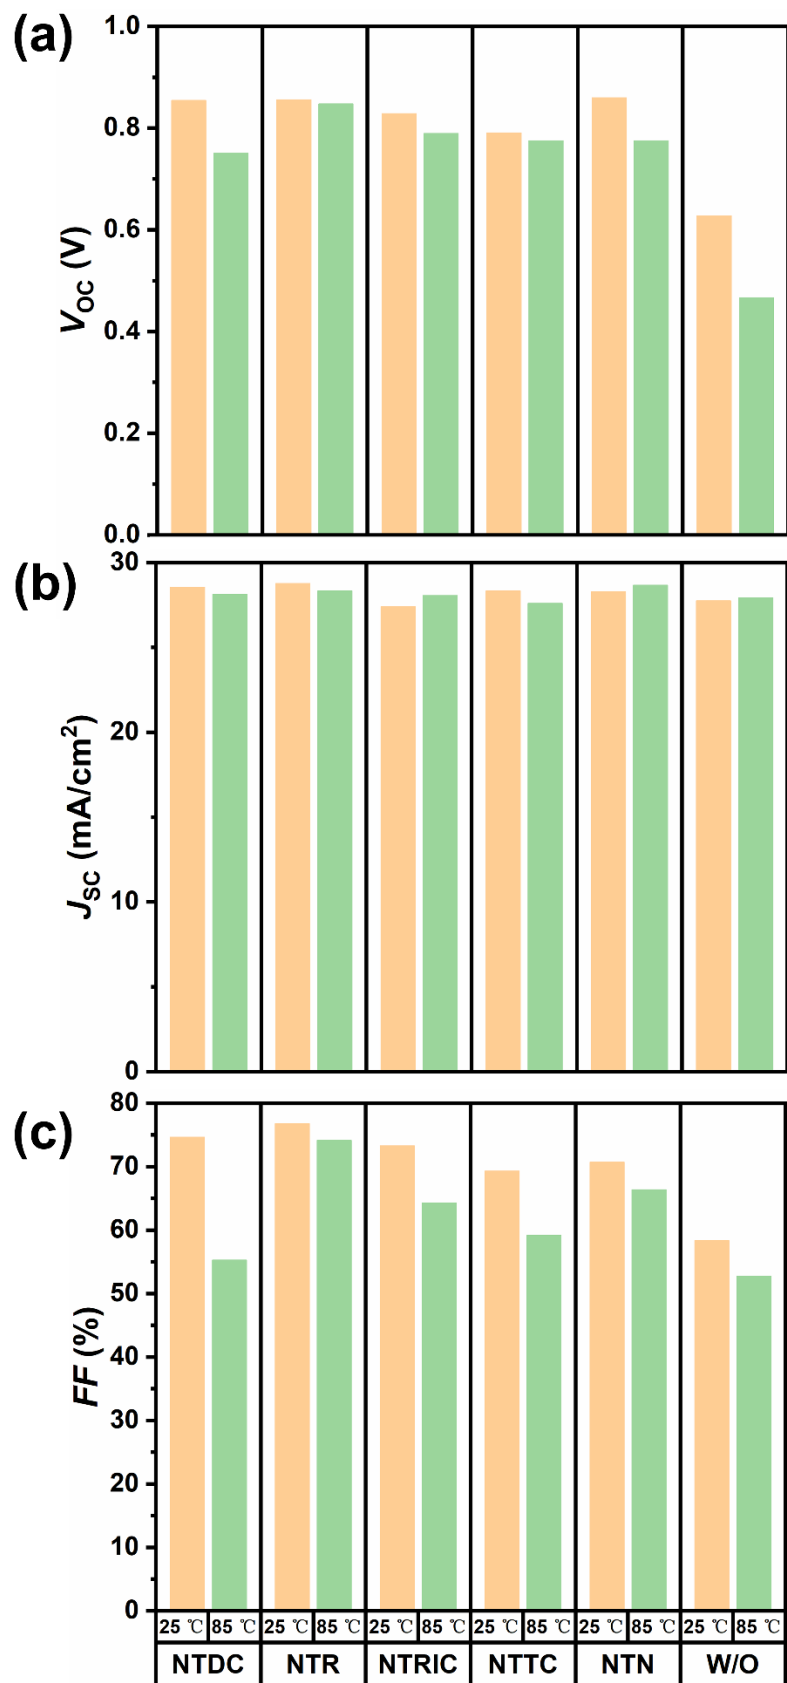

**Fig. S27** The variations of  $V_{oc}$  (a),  $J_{sc}$  (b), and  $FF$  (c) parameters of the optimized fresh (orange) and aged (green) PSCs with or without CIMs.

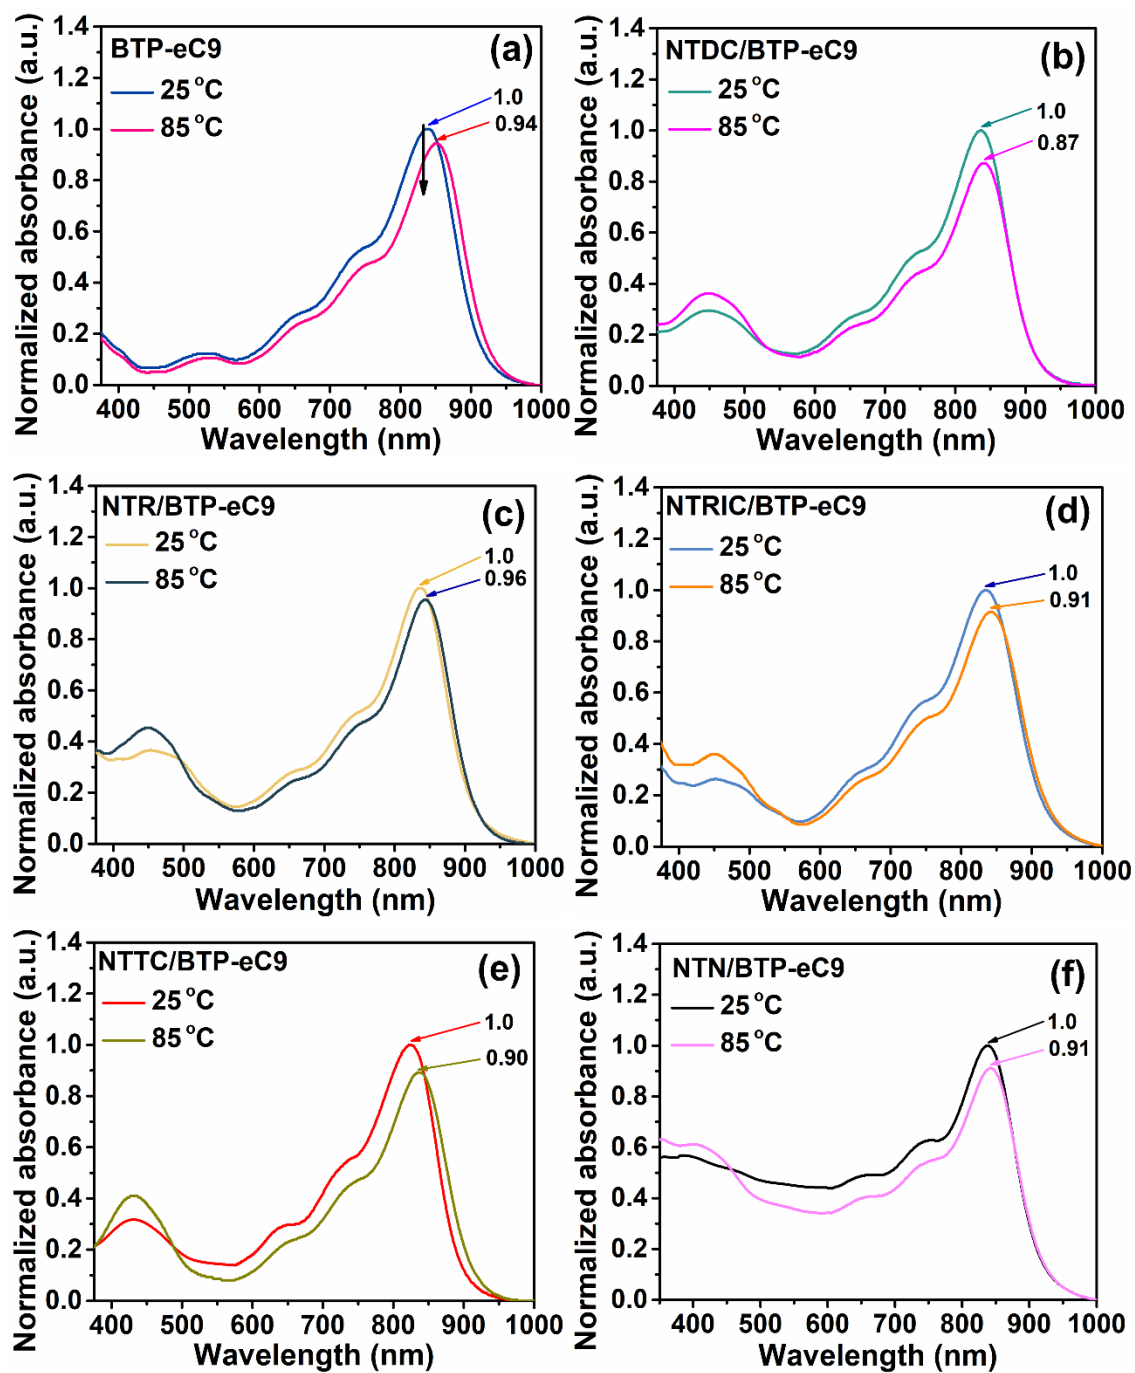

**Fig. S28** UV-vis absorption spectra of the fresh (25 °C) and aged (85 °C) BTP-eC9 neat film and CIM/BTP-eC9 coated films.

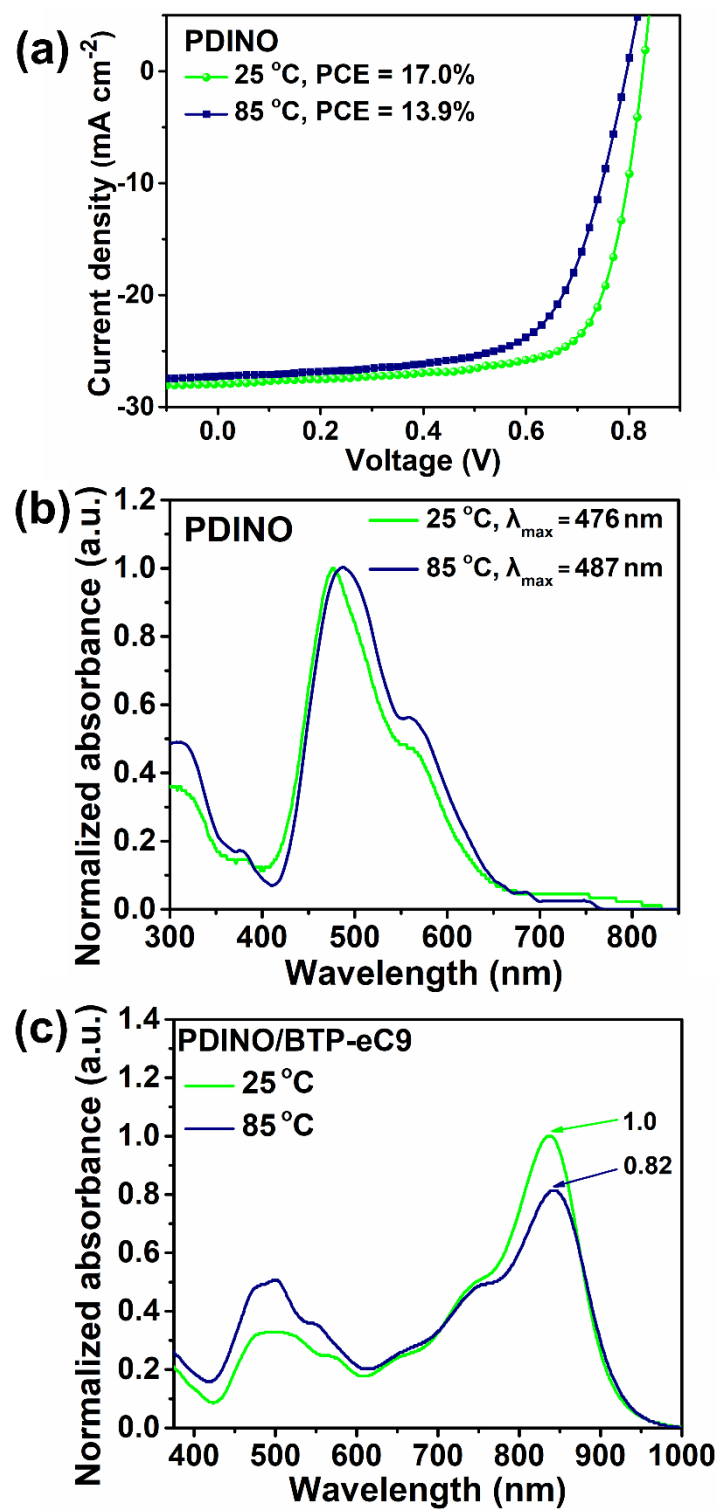

**Fig. S29** Photovoltaic performances of the optimized fresh (25°C) and aged (85°C for 20 min) PSCs with PDINO interlayer.

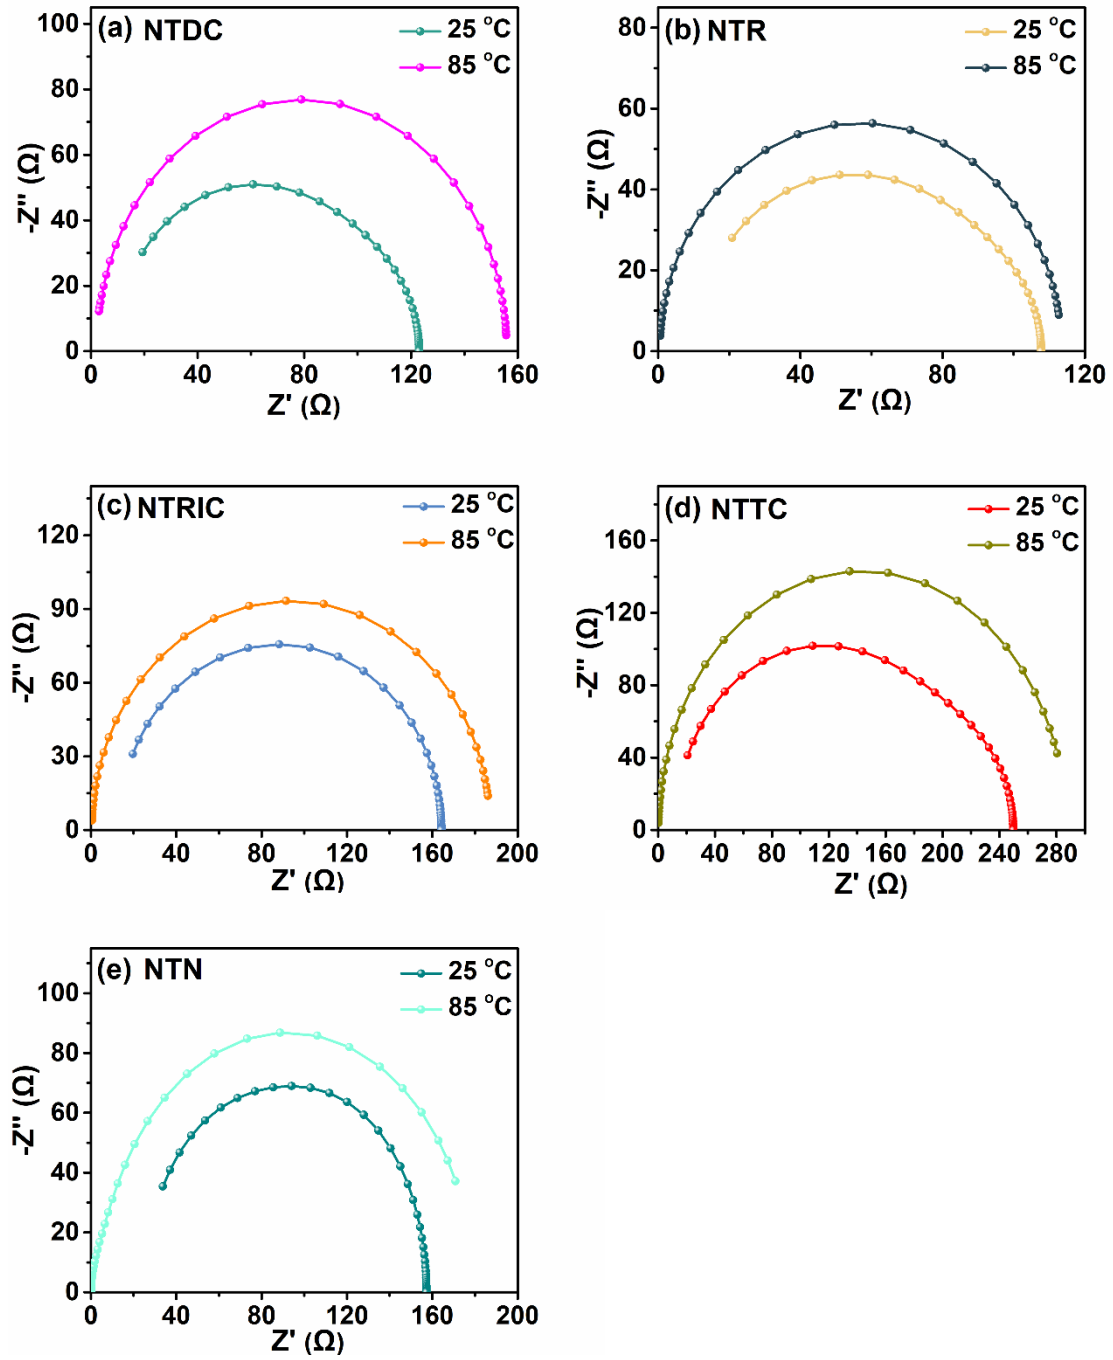

**Fig. S30** Nyquist plots of the optimized fresh (25 °C) and aged (85 °C) devices based on NTDC, NTR, NTRIC, NTTC, and NTN interlayers.

**Table S1** A summary of device performance of NI interlayers based binary PSCs

| CIM    | PAL          | PCE (%) <sup>a</sup> | References                                                        |                         |
|--------|--------------|----------------------|-------------------------------------------------------------------|-------------------------|
| NA     | PM6:Y6       | 0.79                 | <i>ChemSusChem</i> , 2021, <b>14</b> , 4783–4792.                 | Our previous work       |
| NAA    |              | 13.9                 |                                                                   |                         |
| NEA    |              | 15.0                 |                                                                   |                         |
| NT     |              | 1.3                  | <i>J. Colloid Interface Sci.</i> , 2022, <b>627</b> , 880–890.    |                         |
| NTN    |              | 16.6                 |                                                                   |                         |
| N2TN   |              | 13.9                 |                                                                   |                         |
| NEN    |              | 1.2                  | <i>Chem. Eng. J.</i> , 2022, <b>441</b> , 135894.                 |                         |
| NTA    |              | 16.8                 |                                                                   |                         |
| ONTN   |              | 15.4                 | <i>Dyes Pigments</i> , 2023, <b>209</b> , 110911.                 |                         |
| ONBN   |              | 12.6                 |                                                                   |                         |
| NDT-1  | PM6: BTP-eC9 | 13.2                 | <i>Chin. J. Struct. Chem.</i> , 2024, <b>43</b> , 100277.         |                         |
| NDT-2  |              | 17.1                 |                                                                   |                         |
| 3PNIN  |              | 17.7                 | <i>Nano Res.</i> , 2024, <b>17</b> , 1564–1570.                   |                         |
| 3ONIN  |              | 16.8                 |                                                                   |                         |
| TT-N-N | PM6: Y6      | 17.48                | <i>Angew. Chem., Int. Ed.</i> , 2024, DOI:10.1002/anie.202413135. | Work from another group |
| TT-N-M | PM6: BTP-eC9 | 18.44                |                                                                   |                         |
| NTDC   | PM6: BTP-eC9 | 18.2                 |                                                                   | This work               |
| NTR    |              | 18.9                 |                                                                   |                         |
| NTRIC  |              | 17.1                 |                                                                   |                         |
| NTTC   |              | 15.6                 |                                                                   |                         |

<sup>a</sup>The binary device structure: ITO/PEDOT:PSS/PAL/CIM/Al or Ag.

**Table S2** The photovoltaic performance of PSCs based on NTR interlayer with different thickness

| Thickness<br>(nm) | $V_{OC}$<br>(V)          | $J_{SC}$<br>(mA cm <sup>-2</sup> ) | FF<br>(%)            | PCE<br>(%) <sup>a</sup> |
|-------------------|--------------------------|------------------------------------|----------------------|-------------------------|
| 7                 | 0.849<br>(0.847 ± 0.002) | 28.6<br>(28.4 ± 0.1)               | 75.5<br>(75.4 ± 0.1) | 18.3<br>(18.1 ± 0.2)    |
| 10                | 0.855<br>(0.852 ± 0.003) | 28.7<br>(28.6 ± 0.1)               | 76.9<br>(76.7 ± 0.2) | 18.9<br>(18.7 ± 0.2)    |
| 15                | 0.846<br>(0.844 ± 0.003) | 28.5<br>(28.3 ± 0.1)               | 75.5<br>(75.3 ± 0.2) | 18.2<br>(18.0 ± 0.2)    |
| 21                | 0.833<br>(0.830 ± 0.003) | 28.2<br>(28.0 ± 0.1)               | 75.8<br>(75.7 ± 0.1) | 17.8<br>(17.6 ± 0.2)    |
| 27                | 0.829<br>(0.826 ± 0.003) | 28.2<br>(28.1 ± 0.1)               | 72.4<br>(72.3 ± 0.1) | 16.9<br>(16.8 ± 0.1)    |
| 32                | 0.825<br>(0.822 ± 0.003) | 28.1<br>(28.0 ± 0.16)              | 71.7<br>(71.2 ± 0.5) | 16.6<br>(16.4 ± 0.2)    |
| 36                | 0.829<br>(0.827 ± 0.002) | 27.6<br>(27.5 ± 0.1)               | 71.6<br>(71.5 ± 0.1) | 16.4<br>(16.3 ± 0.1)    |

<sup>a</sup>Averaged values in parentheses from eight devices.

**Table S3** The photovoltaic performance of PM6:PC61BM- based devices with or without NTR interlayer

| NTR | $V_{OC}$<br>(V)          | $J_{SC}$<br>(mA cm <sup>-2</sup> ) | FF<br>(%)            | PCE<br>(%) <sup>a</sup> |
|-----|--------------------------|------------------------------------|----------------------|-------------------------|
| N   | 0.710<br>(0.708 ± 0.002) | 7.2<br>(7.0 ± 0.2)                 | 52.9<br>(52.8 ± 0.1) | 2.7<br>(2.6 ± 0.1)      |
| Y   | 0.888<br>(0.885 ± 0.003) | 9.9<br>(9.8 ± 0.1)                 | 61.2<br>(61.0 ± 0.2) | 5.4<br>(5.3 ± 0.1)      |

<sup>a</sup>Averaged values in parentheses from five devices.

**Table S4** Hole and electron mobilities of the optimized PSCs with NI interlayers

| PSCs   | $\mu_h$ ( $10^{-4} \text{ cm}^2 \text{ V}^{-1} \text{ s}^{-1}$ ) | $\mu_e$ ( $10^{-4} \text{ cm}^2 \text{ V}^{-1} \text{ s}^{-1}$ ) | $\mu_h/\mu_e$ |
|--------|------------------------------------------------------------------|------------------------------------------------------------------|---------------|
| NTDC-  | $5.0 \times 10^{-4}$                                             | 4.6                                                              | 1.09          |
| NTR-   |                                                                  | 5.4                                                              | 0.93          |
| NTRIC- |                                                                  | 3.9                                                              | 1.28          |
| NTTC-  |                                                                  | 2.8                                                              | 1.79          |
| NTN-   |                                                                  | 4.0                                                              | 1.25          |

**Table S5** The photovoltaic performance of the optimized fresh (@25 °C) and aged (@85 °C for 20 min) PSCs

|                 | $V_{oc}$<br>(V)          | $J_{sc}$<br>(mA cm <sup>-2</sup> ) | FF<br>(%)             | PCE <sup>a</sup><br>(%) | PCE<br>ratio <sup>b</sup> |
|-----------------|--------------------------|------------------------------------|-----------------------|-------------------------|---------------------------|
| NTDC<br>-25 °C  | 0.854<br>(0.852 ± 0.002) | 28.5<br>(28.3 ± 0.2)               | 74.4<br>(74.2 ± 0.02) | 18.1<br>(17.9 ± 0.2)    | 0.64                      |
| NTDC<br>-85 °C  | 0.750<br>(0.745 ± 0.005) | 28.1<br>(28.0 ± 0.1)               | 55.2<br>(55.0 ± 0.2)  | 11.6<br>(11.5 ± 0.1)    |                           |
| NTR<br>-25 °C   | 0.855<br>(0.850 ± 0.005) | 28.8<br>(28.5 ± 0.3)               | 76.4<br>(76.3 ± 0.1)  | 18.8<br>(18.5 ± 0.3)    | 0.94                      |
| NTR<br>-85 °C   | 0.847<br>(0.843 ± 0.004) | 28.3<br>(28.2 ± 0.1)               | 74.0<br>(73.9 ± 0.1)  | 17.7<br>(17.6 ± 0.1)    |                           |
| NTRIC<br>-25 °C | 0.828<br>(0.826 ± 0.002) | 27.4<br>(27.2 ± 0.2)               | 73.2<br>(73.1 ± 0.1)  | 16.6<br>(16.4 ± 0.2)    | 0.86                      |
| NTRIC<br>-85 °C | 0.789<br>(0.786 ± 0.003) | 28.0<br>(27.9 ± 0.1)               | 64.2<br>(64.1 ± 0.1)  | 14.2<br>(14.1 ± 0.1)    |                           |
| NTTC<br>-25 °C  | 0.790<br>(0.786 ± 0.004) | 28.3<br>(28.2 ± 0.1)               | 69.3<br>(68.9 ± 0.4)  | 15.5<br>(15.3 ± 0.2)    | 0.81                      |
| NTTC<br>-85 °C  | 0.775<br>(0.766 ± 0.009) | 27.6<br>(27.3 ± 0.3)               | 59.1<br>(58.9 ± 0.2)  | 12.6<br>(12.3 ± 0.3)    |                           |
| NTN<br>-25 °C   | 0.859<br>(0.857 ± 0.002) | 28.2<br>(28.1 ± 0.1)               | 70.7<br>(70.6 ± 0.1)  | 17.1<br>(17.0 ± 0.1)    | 0.86                      |
| NTN<br>-85 °C   | 0.775<br>(0.772 ± 0.003) | 28.6<br>(28.5 ± 0.1)               | 66.3<br>(65.6 ± 0.7)  | 14.7<br>(14.4 ± 0.3)    |                           |
| W/O<br>-25 °C   | 0.627<br>(0.626 ± 0.002) | 27.7<br>(27.6 ± 0.2)               | 58.3<br>(58.1 ± 0.2)  | 10.1<br>(10.0 ± 0.1)    | 0.68                      |
| W/O<br>-85 °C   | 0.466<br>(0.465 ± 0.001) | 27.9<br>(28.0 ± 0.1)               | 52.7<br>(52.6 ± 0.1)  | 6.9<br>(6.8 ± 0.1)      |                           |
| PDINO<br>-25 °C | 0.832<br>(0.828 ± 0.004) | 28.2<br>(28.1 ± 0.1)               | 72.5<br>(72.4 ± 0.1)  | 17.0<br>(16.8 ± 0.2)    | 0.82                      |
| PDINO<br>-85 °C | 0.770<br>(0.766 ± 0.004) | 28.1<br>(28.0 ± 0.1)               | 64.4<br>(64.2 ± 0.2)  | 13.9<br>(13.8 ± 0.1)    |                           |

<sup>a</sup>Averaged values in parentheses from eight devices.

<sup>b</sup>PCE ratio = PCE<sub>@85°C</sub> / PCE<sub>@25°C</sub>.

**Table S6** The photovoltaic performance of the aged PSCs heat-treated for 60 min<sup>a</sup>

| CIM   | $V_{OC}$<br>(V)          | $J_{SC}$<br>(mA cm <sup>-2</sup> ) | FF<br>(%)            | PCE <sup>b</sup><br>(%) |
|-------|--------------------------|------------------------------------|----------------------|-------------------------|
| NTR   | 0.841<br>(0.838 ± 0.003) | 28.1<br>(28.0 ± 0.1)               | 72.2<br>(72.0 ± 0.2) | 17.1<br>(16.9 ± 0.2)    |
| NTRIC | 0.759<br>(0.757 ± 0.003) | 27.8<br>(27.5 ± 0.3)               | 63.7<br>(63.1 ± 0.6) | 13.4<br>(13.1 ± 0.3)    |
| NTTC  | 0.692<br>(0.689 ± 0.003) | 25.7<br>(25.5 ± 0.2)               | 57.5<br>(57.1 ± 0.4) | 10.2<br>(10.0 ± 0.2)    |
| NTN   | 0.764<br>(0.762 ± 0.002) | 27.8<br>(27.5 ± 0.3)               | 63.6<br>(63.4 ± 0.2) | 13.5<br>(13.3 ± 0.2)    |

<sup>a</sup>Heating temperature is 85 °C. <sup>b</sup>Averaged values in parentheses from eight devices.**Table S7** The photovoltaic performance of the aged PSCs based on NTR interlayer with different heating time<sup>a</sup>

| heating time<br>(min) | $V_{OC}$<br>(V)          | $J_{SC}$<br>(mA cm <sup>-2</sup> ) | FF<br>(%)            | PCE <sup>b</sup><br>(%) |
|-----------------------|--------------------------|------------------------------------|----------------------|-------------------------|
| 0                     | 0.855<br>(0.850 ± 0.005) | 28.8<br>(28.5 ± 0.3)               | 76.4<br>(76.3 ± 0.1) | 18.8<br>(18.5 ± 0.3)    |
| 20                    | 0.847<br>(0.843 ± 0.004) | 28.3<br>(28.2 ± 0.1)               | 74.0<br>(73.9 ± 0.1) | 17.7<br>(17.6 ± 0.1)    |
| 60                    | 0.841<br>(0.838 ± 0.003) | 28.1<br>(28.0 ± 0.1)               | 72.2<br>(72.0 ± 0.2) | 17.1<br>(16.9 ± 0.2)    |
| 210                   | 0.835<br>(0.832 ± 0.003) | 26.9<br>(26.7 ± 0.2)               | 67.4<br>(67.2 ± 0.2) | 15.1<br>(14.9 ± 0.2)    |

<sup>a</sup>Heating temperature is 85 °C. <sup>b</sup>Averaged values in parentheses from eight devices.

**Table S8** The  $d$ -spacing and  $d$ -spacing variation ( $|\Delta d|$ ) of  $\pi$ - $\pi$  stacking of CIM films

| CIM   | $d_{\text{fresh film}} (25\text{ }^{\circ}\text{C})$<br>(Å) | $d_{\text{aged film}} (85\text{ }^{\circ}\text{C})$<br>(Å) | $ \Delta d ^a$<br>(Å) |
|-------|-------------------------------------------------------------|------------------------------------------------------------|-----------------------|
| NTDC  | 3.53                                                        | 3.70                                                       | 0.17                  |
| NTR   | 3.52                                                        | 3.50                                                       | 0.02                  |
| NTRIC | 3.56                                                        | 3.46                                                       | 0.10                  |
| NTTC  | 3.57                                                        | 3.73                                                       | 0.16                  |
| NTN   | 3.60                                                        | 3.77                                                       | 0.17                  |

$$^a|\Delta d| = |d_{\text{fresh film}} - d_{\text{aged film}}|.$$

**Table S9** The  $R_s$  of the optimized fresh (25°C) and aged (85°C) PSCs based on NI CIMs

| CIM   | $R_s (25\text{ }^{\circ}\text{C})$<br>( $\Omega$ ) | $R_s (85\text{ }^{\circ}\text{C})$<br>( $\Omega$ ) | $\Delta R_s^a$<br>( $\Omega$ ) |
|-------|----------------------------------------------------|----------------------------------------------------|--------------------------------|
| NTDC  | 123.1                                              | 155.8                                              | 32.7                           |
| NTR   | 107.7                                              | 112.5                                              | 4.8                            |
| NTRIC | 164.3                                              | 186.1                                              | 21.8                           |
| NTTC  | 249.8                                              | 280.5                                              | 30.7                           |
| NTN   | 157.3                                              | 170.9                                              | 13.6                           |

$$^a\Delta R_s = R_{s, \text{aged PSC}} - R_{s, \text{fresh PSC}}.$$

## References

- 1 P. Luo, K. An, L. Ying, G. Li, C. Zhu, B. Fan, F. Huang and Y. Cao, *J. Mater. Chem. C*, 2020, **8**, 5273–5279.
- 2 Q. Liao, Q. Kang, Y. Yang, C. An, B. Xu and J. Hou, *Adv. Mater.*, 2020, **32**, e1906557.
- 3 M. Zhang, X. Guo, W. Ma, H. Ade and J. Hou, *Adv. Mater.*, 2015, **27**, 4655–4660.
- 4 Y. Cui, H. Yao, J. Zhang, K. Xian, T. Zhang, L. Hong, Y. Wang, Y. Xu, K. Ma, C. An, C. He, Z. Wei, F. Gao and J. Hou, *Adv. Mater.*, 2020, **32**, e1908205.

5 P. N. Murgatroyd, *J. Phys. D Appl. Phys.*, 1970, **3**, 151–156.

6 Y. Zhao, Y. Liu, X. Liu, X. Kang, L. Yu, S. Dai and M. Sun, *ChemSusChem*, 2021, **14**, 4783–4792.
